# Supplementary material
Source: PubMed Central journal article supplement (PMC3212421)
Supplement: supp_214.23.3977_JEB061499FigS1.pdf [file supp_214.23.3977_JEB061499FigS1.pdf]

**A**

Day 1: grafting (pm)

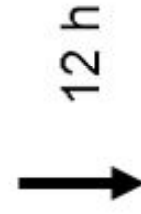

Day 2: dsRNA (am)

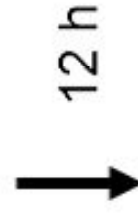

Day 2: dsRNA (pm)

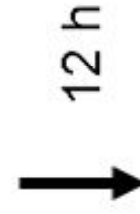

Day 3: dsRNA (am)

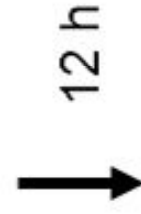

Day 3: dsRNA (pm)

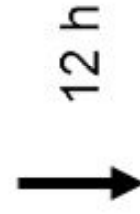

Day 4: normal feeding (am)

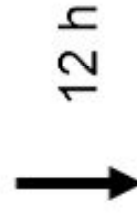

Day 4: normal feeding (pm)

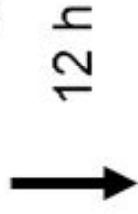

Day 5: normal feeding (am)

**B**

Day 1: grafting (pm)

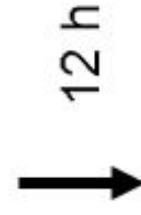

Day 2: dsRNA (am)

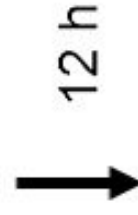

Day 2: dsRNA (pm)

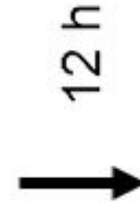

Day 3: dsRNA (am)

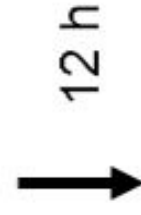

Day 3: dsRNA (pm)

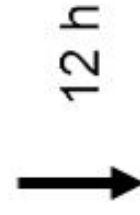

Day 4: JH/acetone (am)

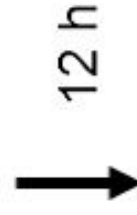

Day 4: normal feeding (pm)

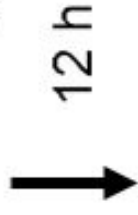

Day 5: JH/acetone (am)
