# Supplementary material
Source: PubMed Central journal article supplement (PMC3212421)
Supplement: supp_214.23.3977_JEB061499FigS4.pdf [file supp_214.23.3977_JEB061499FigS4.pdf]

**IRS<sup>-</sup>**

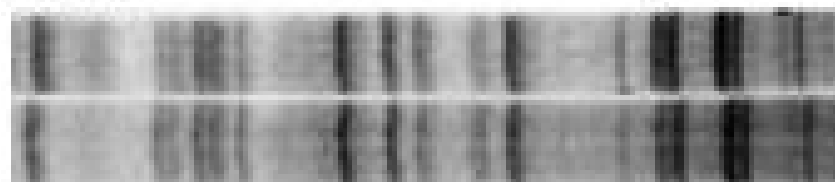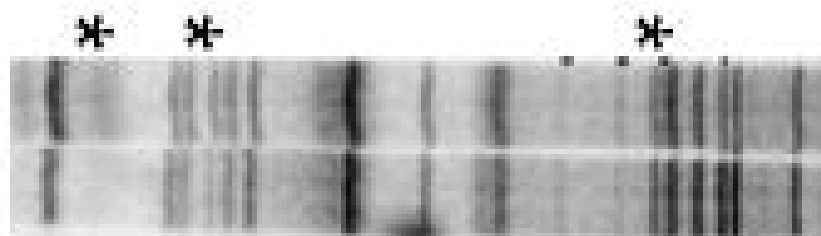

**MspI**  
**HpaII**

**TOR<sup>-</sup>**

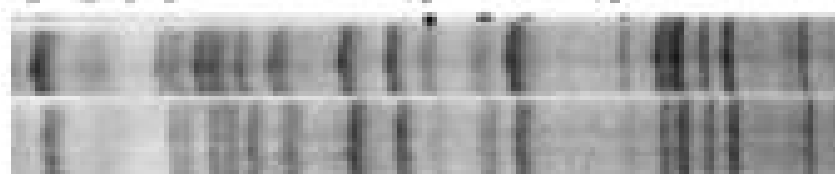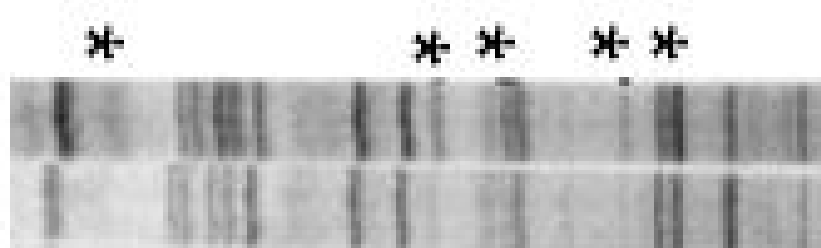

**MspI**  
**HpaII**

**IRS/TOR<sup>-</sup>**

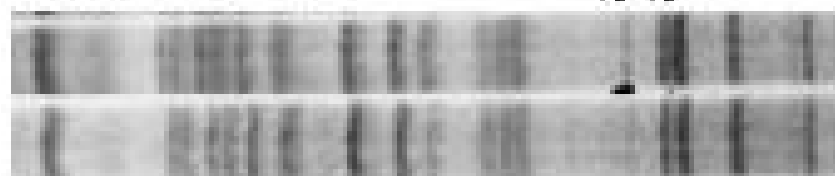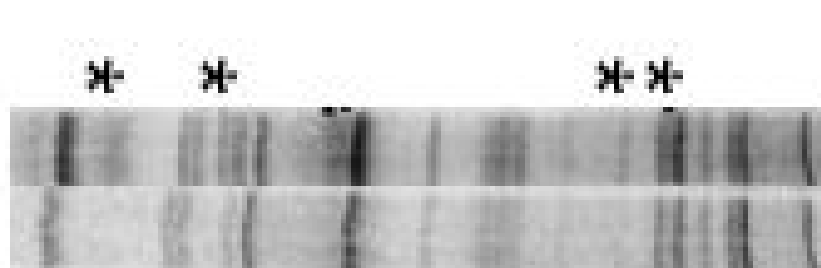

**MspI**  
**HpaII**

**Control**

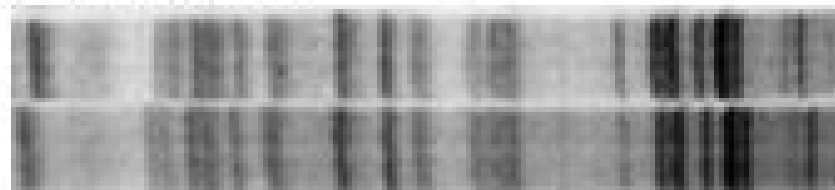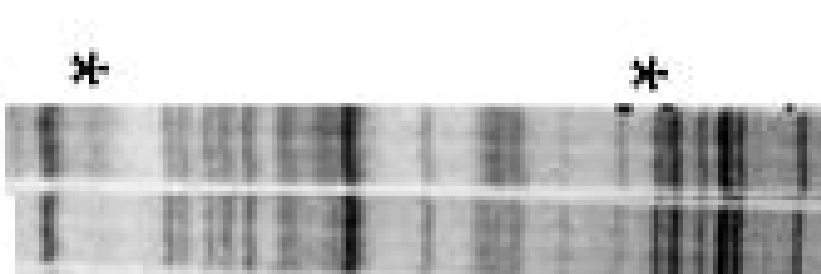

**MspI**  
**HpaII**

**5th Instar**

**4th Instar**
