# Supplementary material
Source: PubMed Central journal article supplement (PMC3212421)
Supplement: supp_214.23.3977_JEB061499TableS1.pdf [file supp_214.23.3977_JEB061499TableS1.pdf]

Differences in the abundance of honeybee protein species between sample groups

IRS-: dsRNA-mediated knockdown of its expression

TOR-: dsRNA-mediated knockdown of tor expression

(IRS-/TOR-): double knockdown

Control: individuals treated with olo dsRNA

Kwvalue: pvalue obtained following a Kruskal Wallis ANOVA

pvalue: pvalue results from a Mann-Whitney Utest

pvalue cutoff: pvalue corresponding to the 5 % cutoff from the distribution obtained through bootstrap correction

Sample 1, sample 2: groups of individuals for the specified comparison

Note that some peptides can match to more than one protein, which leads to redundant results.

Proteins were only included, if they displayed at least a spectral count of three in at least three out of the five replicates of at least one sample group.

| Protein description                                                                                          | KWvalue | IRS-/TOR-<br>pvalue | U      | sample 1<br>Rank sum | sample 2<br>Rank sum | Total<br>Rank sum | sample 1<br>Replicates | sample 2<br>Replicates | pvalue cutoff |
|--------------------------------------------------------------------------------------------------------------|---------|---------------------|--------|----------------------|----------------------|-------------------|------------------------|------------------------|---------------|
| XP_623194 PREDICTED: similar to CG6180-PA isoform 2 [Apis mellifera]                                         | 0.002   | 0.095               | 21,000 | 36,000               | 19,000               | 55,000            | 5,000                  | 5,000                  | 0.198         |
| XP_392060 PREDICTED: similar to CG6180-PA isoform 1 [Apis mellifera]                                         | 0.002   | 0.095               | 21,000 | 36,000               | 19,000               | 55,000            | 5,000                  | 5,000                  | 0.198         |
| XP_00112297 PREDICTED: similar to CG6244-CG2431-PA [Apis mellifera]                                          | 0.003   | 0.095               | 3,000  | 18,000               | 37,000               | 55,000            | 5,000                  | 5,000                  | 0.198         |
| XP_62419 PREDICTED: similar to CG1187-PA [Apis mellifera]                                                    | 0.004   | 0.241               | 8,000  | 23,000               | 32,000               | 55,000            | 5,000                  | 5,000                  | 0.198         |
| XP_00112128 PREDICTED: similar to CG32405-PA [Apis mellifera]                                                | 0.007   | 1.000               | 13,000 | 28,000               | 27,000               | 55,000            | 5,000                  | 5,000                  | 0.198         |
| XP_624628 PREDICTED: similar to CG6206-PB isoform B [Apis mellifera]                                         | 0.008   | 0.690               | 30,000 | 30,000               | 25,000               | 55,000            | 5,000                  | 5,000                  | 0.198         |
| XP_39444 PREDICTED: similar to thiochrome peroxidase 1 CG1633-PA isoform A isoform 1 [Apis mellifera]        | 0.011   | 0.421               | 17,000 | 32,000               | 23,000               | 55,000            | 5,000                  | 5,000                  | 0.198         |
| XP_00112189 PREDICTED: similar to CG31618-PA [Apis mellifera]                                                | 0.012   | 0.095               | 21,000 | 36,000               | 19,000               | 55,000            | 5,000                  | 5,000                  | 0.198         |
| XP_001122914 PREDICTED: similar to CG31506-PA [Apis mellifera]                                               | 0.013   | 0.421               | 8,000  | 23,000               | 32,000               | 55,000            | 5,000                  | 5,000                  | 0.198         |
| XP_624700 PREDICTED: similar to CG31618-PA [Apis mellifera]                                                  | 0.013   | 0.095               | 21,000 | 36,000               | 19,000               | 55,000            | 5,000                  | 5,000                  | 0.198         |
| XP_00112934 PREDICTED: similar to CG31618-PA [Apis mellifera]                                                | 0.013   | 0.095               | 21,000 | 36,000               | 19,000               | 55,000            | 5,000                  | 5,000                  | 0.198         |
| XP_00112344 PREDICTED: similar to CG31618-PA [Apis mellifera]                                                | 0.013   | 0.095               | 21,000 | 36,000               | 19,000               | 55,000            | 5,000                  | 5,000                  | 0.198         |
| XP_001119899 PREDICTED: similar to CG31618-PA [Apis mellifera]                                               | 0.013   | 0.095               | 21,000 | 36,000               | 19,000               | 55,000            | 5,000                  | 5,000                  | 0.198         |
| XP_395047 PREDICTED: similar to Phosphotyrosine kinase isoform 1 [Apis mellifera]                            | 0.014   | 0.421               | 8,000  | 23,000               | 32,000               | 55,000            | 5,000                  | 5,000                  | 0.198         |
| XP_001120262 PREDICTED: similar to Actin 88F CG5178-PA [Apis mellifera]                                      | 0.014   | 0.095               | 22,000 | 37,000               | 18,000               | 55,000            | 5,000                  | 5,000                  | 0.208         |
| XP_62404 PREDICTED: similar to Larval serum protein 2 CG8086-PA [Apis mellifera]                             | 0.014   | 0.548               | 18,000 | 31,000               | 24,000               | 55,000            | 5,000                  | 5,000                  | 0.198         |
| XP_392261 PREDICTED: similar to CG849A-CG2342-PA [Apis mellifera]                                            | 0.016   | 1.000               | 12,000 | 22,000               | 23,000               | 55,000            | 5,000                  | 5,000                  | 0.208         |
| XP_624806 PREDICTED: similar to CG7217-PB isoform B [Apis mellifera]                                         | 0.016   | 0.095               | 21,000 | 36,000               | 19,000               | 55,000            | 5,000                  | 5,000                  | 0.167         |
| XP_623342 PREDICTED: similar to Adolase CG6058-PF isoform F [Apis mellifera]                                 | 0.017   | 0.690               | 15,000 | 30,000               | 25,000               | 55,000            | 5,000                  | 5,000                  | 0.198         |
| NP_0001158 Major royal jelly protein 2 [Apis mellifera]                                                      | 0.019   | 0.690               | 10,000 | 25,000               | 30,000               | 55,000            | 5,000                  | 5,000                  | 0.198         |
| XP_392260 PREDICTED: similar to Calcitonin CG843-PA isoform 1 [Apis mellifera]                               | 0.020   | 0.690               | 15,000 | 30,000               | 25,000               | 55,000            | 5,000                  | 5,000                  | 0.198         |
| NP_0001160 Major royal jelly protein 3 [Apis mellifera]                                                      | 0.021   | 0.841               | 14,000 | 29,000               | 26,000               | 55,000            | 5,000                  | 5,000                  | 0.208         |
| XP_392478 PREDICTED: similar to mitochondrial malate dehydrogenase precursor isoform 1 [Apis mellifera]      | 0.022   | 0.095               | 4,000  | 19,000               | 36,000               | 55,000            | 5,000                  | 5,000                  | 0.198         |
| XP_392501 PREDICTED: similar to Myosin protein 20 CG489-PA [Apis mellifera]                                  | 0.022   | 0.151               | 20,000 | 35,000               | 20,000               | 55,000            | 5,000                  | 5,000                  | 0.208         |
| XP_00112101 PREDICTED: similar to HLA-A-associated transcript 3 [Apis mellifera]                             | 0.023   | 0.548               | 16,000 | 33,000               | 23,000               | 55,000            | 5,000                  | 5,000                  | 0.198         |
| XP_392616 PREDICTED: similar to apoptic CG5393-PB isoform B [Apis mellifera]                                 | 0.023   | 0.222               | 6,000  | 21,000               | 34,000               | 55,000            | 5,000                  | 5,000                  | 0.198         |
| XP_623199 PREDICTED: similar to Hsc70Ch CG6603-PA isoform 1 [Apis mellifera]                                 | 0.024   | 0.095               | 19,000 | 36,000               | 19,000               | 55,000            | 5,000                  | 5,000                  | 0.198         |
| XP_624749 PREDICTED: similar to Actin-87E isoform 2 [Apis mellifera]                                         | 0.026   | 0.421               | 17,000 | 32,000               | 23,000               | 55,000            | 5,000                  | 5,000                  | 0.198         |
| XP_624748 PREDICTED: similar to Actin-88F CG5178-PA [Apis mellifera]                                         | 0.027   | 0.421               | 17,000 | 32,000               | 23,000               | 55,000            | 5,000                  | 5,000                  | 0.198         |
| XP_623819 PREDICTED: similar to Actin-87E isoform 1 [Apis mellifera]                                         | 0.027   | 0.310               | 18,000 | 33,000               | 22,000               | 55,000            | 5,000                  | 5,000                  | 0.167         |
| XP_623826 PREDICTED: similar to Actin-87E isoform 1 [Apis mellifera]                                         | 0.027   | 0.310               | 18,000 | 33,000               | 22,000               | 55,000            | 5,000                  | 5,000                  | 0.208         |
| XP_624694 PREDICTED: similar to Actin-87E isoform 2 [Apis mellifera]                                         | 0.027   | 0.310               | 18,000 | 33,000               | 22,000               | 55,000            | 5,000                  | 5,000                  | 0.198         |
| XP_624738 PREDICTED: similar to Actin-SC isoform 2 [Apis mellifera]                                          | 0.028   | 0.310               | 18,000 | 33,000               | 22,000               | 55,000            | 5,000                  | 5,000                  | 0.198         |
| XP_393368 PREDICTED: similar to Actin-SC isoform 1 [Apis mellifera]                                          | 0.028   | 0.310               | 18,000 | 33,000               | 22,000               | 55,000            | 5,000                  | 5,000                  | 0.214         |
| XP_392701 PREDICTED: similar to CG6459-PA [Apis mellifera]                                                   | 0.031   | 0.310               | 7,000  | 22,000               | 33,000               | 55,000            | 5,000                  | 5,000                  | 0.208         |
| XP_624289 PREDICTED: similar to EG96 CG5883-PA isoform A isoform 2 [Apis mellifera]                          | 0.032   | 0.095               | 22,000 | 37,000               | 18,000               | 55,000            | 5,000                  | 5,000                  | 0.198         |
| XP_392970 PREDICTED: similar to CG8789-PA isoform A [Apis mellifera]                                         | 0.033   | 0.548               | 16,000 | 33,000               | 25,000               | 55,000            | 5,000                  | 5,000                  | 0.198         |
| XP_001122757 PREDICTED: similar to yellow-e2 CG17044-PA [Apis mellifera]                                     | 0.034   | 0.841               | 14,000 | 29,000               | 26,000               | 55,000            | 5,000                  | 5,000                  | 0.198         |
| XP_623130 PREDICTED: similar to heat shock protein 8 isoform 1 [Apis mellifera]                              | 0.035   | 1.000               | 12,000 | 27,000               | 28,000               | 55,000            | 5,000                  | 5,000                  | 0.175         |
| XP_623084 PREDICTED: similar to Aldolase dehydrogenase CG3752-PA isoform 1 [Apis mellifera]                  | 0.041   | 0.841               | 11,000 | 26,000               | 29,000               | 55,000            | 5,000                  | 5,000                  | 0.198         |
| XP_394030 PREDICTED: similar to Tubulin beta 2 [Apis mellifera]                                              | 0.044   | 0.690               | 10,000 | 25,000               | 30,000               | 55,000            | 5,000                  | 5,000                  | 0.168         |
| XP_624156 PREDICTED: similar to ATP synthase CG1154-PA isoform A [Apis mellifera]                            | 0.048   | 0.548               | 16,000 | 33,000               | 23,000               | 55,000            | 5,000                  | 5,000                  | 0.198         |
| XP_392933 PREDICTED: similar to heat shock protein 8 isoform 1 [Apis mellifera]                              | 0.052   | 0.690               | 10,000 | 25,000               | 30,000               | 55,000            | 5,000                  | 5,000                  | 0.198         |
| XP_625015 PREDICTED: similar to Actin-SC [Apis mellifera]                                                    | 0.056   | 0.310               | 18,000 | 33,000               | 22,000               | 55,000            | 5,000                  | 5,000                  | 0.198         |
| NP_000112106 PREDICTED: similar to T04C12.5, partial [Apis mellifera]                                        | 0.058   | 0.310               | 18,000 | 33,000               | 22,000               | 55,000            | 5,000                  | 5,000                  | 0.198         |
| XP_392900 PREDICTED: similar to Heat shock protein cognate 3 CG4147-PA isoform A [Apis mellifera]            | 0.058   | 0.690               | 10,000 | 25,000               | 31,000               | 55,000            | 5,000                  | 5,000                  | 0.198         |
| XP_625004 PREDICTED: similar to CG15006-PA [Apis mellifera]                                                  | 0.078   | 0.310               | 7,000  | 22,000               | 33,000               | 55,000            | 5,000                  | 5,000                  | 0.208         |
| XP_623556 PREDICTED: similar to Nascant polyubiquitin associated complex protein alpha subunit CG8759-PB     | 0.082   | 0.548               | 9,000  | 24,000               | 31,000               | 55,000            | 5,000                  | 5,000                  | 0.151         |
| XP_392760 PREDICTED: similar to Protein lethal2/essential for life (Protein Etl2) isoform 1 [Apis mellifera] | 0.085   | 0.841               | 14,000 | 29,000               | 26,000               | 55,000            | 5,000                  | 5,000                  | 0.198         |
| XP_00112299 PREDICTED: similar to CG3894-PB isoform B [Apis mellifera]                                       | 0.092   | 0.690               | 10,000 | 25,000               | 30,000               | 55,000            | 5,000                  | 5,000                  | 0.198         |
| XP_395268 PREDICTED: similar to CG3523-PA [Apis mellifera]                                                   | 0.111   | 1.000               | 13,000 | 28,000               | 27,000               | 55,000            | 5,000                  | 5,000                  | 0.198         |
| XP_623046 PREDICTED: similar to Troponin-51 CG4898-PD isoform D [Apis mellifera]                             | 0.112   | 0.548               | 9,000  | 24,000               | 31,000               | 55,000            | 5,000                  | 5,000                  | 0.208         |
| XP_001121027 PREDICTED: similar to CG3244-PA [Apis mellifera]                                                | 0.128   | 0.222               | 19,000 | 34,000               | 21,000               | 55,000            | 5,000                  | 5,000                  | 0.198         |
| XP_393343 PREDICTED: similar to Myosin heavy chain CG17927-PB isoform B isoform 1 [Apis mellifera]           | 0.127   | 0.421               | 17,000 | 32,000               | 23,000               | 55,000            | 5,000                  | 5,000                  | 0.198         |
| XP_393338 PREDICTED: similar to Cyclophilin 1 CG9916-PA [Apis mellifera]                                     | 0.132   | 0.841               | 14,000 | 29,000               | 26,000               | 55,000            | 5,000                  | 5,000                  | 0.198         |
| NP_00014993 Elongation factor 1-alpha [Apis mellifera]                                                       | 0.138   | 0.841               | 11,000 | 26,000               | 29,000               | 55,000            | 5,000                  | 5,000                  | 0.198         |
| XP_623234 PREDICTED: similar to zinc finger CG15792-PD isoform D [Apis mellifera]                            | 0.154   | 0.421               | 8,000  | 23,000               | 32,000               | 55,000            | 5,000                  | 5,000                  | 0.214         |
| XP_394991 PREDICTED: similar to Tubulin alpha 8 chain (Alpha-tubulin 8)                                      | 0.164   | 0.690               | 10,000 | 25,000               | 30,000               | 55,000            | 5,000                  | 5,000                  | 0.198         |
| XP_001120098 PREDICTED: similar to tubulin_alpha 1 [Apis mellifera]                                          | 0.164   | 0.841               | 11,000 | 25,000               | 19,000               | 55,000            | 5,000                  | 5,000                  | 0.198         |
| XP_392426 PREDICTED: similar to Troponin-51 CG4898-PD isoform D isoform 1 [Apis mellifera]                   | 0.169   | 1.000               | 12,000 | 27,000               | 28,000               | 55,000            | 5,000                  | 5,000                  | 0.208         |
| XP_392426 PREDICTED: similar to CG14207-PB isoform B isoform 2 [Apis mellifera]                              | 0.174   | 0.421               | 8,000  | 23,000               | 32,000               | 55,000            | 5,000                  | 5,000                  | 0.208         |
| XP_623890 PREDICTED: similar to heat shock protein 90 alpha isoform 2 [Apis mellifera]                       | 0.188   | 0.690               | 10,000 | 25,000               | 30,000               | 55,000            | 5,000                  | 5,000                  | 0.198         |
| XP_392458 PREDICTED: similar to heat shock protein 90 alpha isoform 1 [Apis mellifera]                       | 0.188   | 0.690               | 10,000 | 25,000               | 30,000               | 55,000            | 5,000                  | 5,000                  | 0.198         |
| XP_624767 PREDICTED: hypothetical protein [Apis mellifera]                                                   | 0.198   | 1.000               | 13,000 | 28,000               | 27,000               | 55,000            | 5,000                  | 5,000                  | 0.208         |
| XP_624747 PREDICTED: similar to Troponin-51 CG4898-PB isoform B isoform 2 [Apis mellifera]                   | 0.204   | 1.000               | 13,000 | 28,000               | 27,000               | 55,000            | 5,000                  | 5,000                  | 0.198         |
| NP_00012022 PREDICTED: hypothetical protein [Apis mellifera]                                                 | 0.204   | 0.690               | 10,000 | 25,000               | 30,000               | 55,000            | 5,000                  | 5,000                  | 0.168         |
| XP_001120345 PREDICTED: similar to Tubulin alpha 3 chain (Alpha-tubulin 3), partial [Apis mellifera]         | 0.204   | 0.690               | 10,000 | 25,000               | 30,000               | 55,000            | 5,000                  | 5,000                  | 0.198         |
| NP_00011628 Translation elongation factor eEF-1 alpha chain [Apis mellifera]                                 | 0.222   | 0.421               | 17,000 | 32,000               | 23,000               | 55,000            | 5,000                  | 5,000                  | 0.198         |
| XP_393371 PREDICTED: similar to Myosin regulatory light chain 2 (MLC-2) [Apis mellifera]                     | 0.226   | 0.310               | 7,000  | 22,000               | 33,000               | 55,000            | 5,000                  | 5,000                  | 0.208         |
| XP_000112168 PREDICTED: similar to CG32405-PA [Apis mellifera]                                               | 0.248   | 1.000               | 12,000 | 27,000               | 28,000               | 55,000            | 5,000                  | 5,000                  | 0.198         |
| XP_392920 PREDICTED: similar to knectin 1 [Apis mellifera]                                                   | 0.281   | 0.421               | 8,000  | 23,000               | 32,000               | 55,000            | 5,000                  | 5,000                  | 0.198         |
| NP_00011600 Hexamerin 70b [Apis mellifera]                                                                   | 0.289   | 0.222               | 6,000  | 21,000               | 34,000               | 55,000            | 5,000                  | 5,000                  | 0.198         |
| XP_624361 PREDICTED: similar to Peroxidoxin 2540 CG11765-PA [Apis mellifera]                                 | 0.300   | 0.841               | 11,000 | 26,000               | 29,000               | 55,000            | 5,000                  | 5,000                  | 0.198         |
| XP_395270 PREDICTED: similar to Dodeca-salicylate-binding protein 1 CG5170-PC isoform C [Apis mellifera]     | 0.309   | 0.548               | 16,000 | 31,000               | 24,000               | 55,000            | 5,000                  | 5,000                  | 0.198         |
| XP_39541 PREDICTED: similar to Glycogen 93 CG4520-PA isoform 1 [Apis mellifera]                              | 0.313   | 0.690               | 10,000 | 25,000               | 32,000               | 55,000            | 5,000                  | 5,000                  | 0.198         |
| XP_392313 PREDICTED: similar to Tubulin alpha 56D CG9277-PB isoform B [Apis mellifera]                       | 0.354   | 0.690               | 10,000 | 25,000               | 30,000               | 55,000            | 5,000                  | 5,000                  | 0.198         |
| NP_00014429 Major royal jelly protein 7 [Apis mellifera]                                                     | 0.359   | 1.000               | 13,000 | 28,000               | 27,000               | 55,000            | 5,000                  | 5,000                  | 0.208         |
| XP_391981 PREDICTED: similar to Troponin-51 CG4843-PB isoform B [Apis mellifera]                             | 0.374   | 0.151               | 5,000  | 20,000               | 35,000               | 55,000            | 5,000                  | 5,000                  | 0.198         |
| XP_623893 PREDICTED: similar to Troponin-51 CG4898-PD isoform B isoform 1 [Apis mellifera]                   | 0.421   | 0.690               | 10,000 | 25,000               | 30,000               | 55,000            | 5,000                  | 5,000                  | 0.198         |
| XP_001122917 PREDICTED: hypothetical protein [Apis mellifera]                                                | 0.475   | 0.151               | 5,000  | 20,000               | 35,000               | 55,000            | 5,000                  | 5,000                  | 0.198         |
| XP_392471 PREDICTED: similar to Heat shock protein cognate 5 CG8542-PA [Apis mellifera]                      | 0.484   | 0.690               | 10,000 | 25,000               | 30,000               | 55,000            | 5,000                  | 5,000                  | 0.198         |
| XP_624298 PREDICTED: similar to Troponin-51 CG4898-PA isoform A [Apis mellifera]                             | 0.518   | 0.421               | 8,000  | 23,000               | 32,000               | 55,000            | 5,000                  | 5,000                  | 0.198         |
| NP_00010331 Spermatid protein 14 [Apis mellifera]                                                            | 0.547   | 1.000               | 13,000 | 28,000               | 27,000               | 55,000            | 5,000                  | 5,000                  | 0.168         |
| XP_001122471 PREDICTED: similar to 3-hydroxyacyl-CoA dehydrogenase type-2                                    | 0.556   | 1.000               | 13,000 | 28,000               | 27,000               | 55,000            | 5,000                  | 5,000                  | 0.198         |
| XP_623083 PREDICTED: similar to ATP citrate lyase CG8322-PA isoform A isoform 1 [Apis mellifera]             | 0.559   | 1.000               | 13,000 | 28,000               | 27,000               | 55,000            | 5,000                  | 5,000                  | 0.208         |
| XP_624156 PREDICTED: similar to ATP citrate lyase CG8322-PA isoform A isoform 2 [Apis mellifera]             | 0.559   | 1.000               | 13,000 | 28,000               | 27,000               | 55,000            |                        |                        |               |

| Protein description                                                                                           | K/Wvalue | IRS-/IRS-/TOR- | U      | sample 1 | sample 2 | Total    | sample 1   | sample 2   |               |
|---------------------------------------------------------------------------------------------------------------|----------|----------------|--------|----------|----------|----------|------------|------------|---------------|
|                                                                                                               |          | pvalue         | U      | Rank sum | Rank sum | Rank sum | Replicates | Replicates | pvalue cutoff |
| XP 623154IPREDICTED: similar to CG6180-PA isoform 2 [Apis mellifera]                                          | 0.002    | 0.222          | 6,000  | 21,000   | 34,000   | 55,000   | 5,000      | 5,000      | 0.206         |
| XP 392060IPREDICTED: similar to CG6180-PA isoform 1 [Apis mellifera]                                          | 0.002    | 0.222          | 6,000  | 21,000   | 34,000   | 55,000   | 5,000      | 5,000      | 0.151         |
| XP 00112307IPREDICTED: similar to CG6180-PA isoform 1 [Apis mellifera]                                        | 0.003    | 0.056          | 3,000  | 18,000   | 37,000   | 55,000   | 5,000      | 5,000      | 0.206         |
| XP 624910IPREDICTED: similar to CG11267-PA [Apis mellifera]                                                   | 0.005    | 0.010          | 18,000 | 39,000   | 57,000   | 55,000   | 5,000      | 5,000      | 0.206         |
| XP 00112147IPREDICTED: similar to CG33205-PA [Apis mellifera]                                                 | 0.007    | 0.222          | 19,000 | 38,000   | 57,000   | 55,000   | 5,000      | 5,000      | 0.190         |
| XP 624628IPREDICTED: similar to CG6206-PB isoform B [Apis mellifera]                                          | 0.008    | 0.310          | 7,000  | 22,000   | 33,000   | 55,000   | 5,000      | 5,000      | 0.175         |
| XP 393445IPREDICTED: similar to thioredoxin peroxidase 1 CG1633-PA isoform A isoform 1 [Apis mellifera]       | 0.011    | 0.841          | 11,000 | 26,000   | 29,000   | 55,000   | 5,000      | 5,000      | 0.206         |
| XP 00112018IPREDICTED: similar to CG31618-PA [Apis mellifera]                                                 | 0.012    | 0.421          | 17,000 | 32,000   | 24,000   | 55,000   | 5,000      | 5,000      | 0.188         |
| XP 00112314IPREDICTED: similar to CG31608-PA [Apis mellifera]                                                 | 0.013    | 0.548          | 9,000  | 24,000   | 31,000   | 55,000   | 5,000      | 5,000      | 0.190         |
| XP 624700IPREDICTED: similar to CG31618-PA [Apis mellifera]                                                   | 0.013    | 0.421          | 17,000 | 32,000   | 24,000   | 55,000   | 5,000      | 5,000      | 0.188         |
| XP 001120934IPREDICTED: similar to CG31618-PA [Apis mellifera]                                                | 0.013    | 0.421          | 17,000 | 32,000   | 24,000   | 55,000   | 5,000      | 5,000      | 0.206         |
| XP 001120346IPREDICTED: similar to CG31618-PA [Apis mellifera]                                                | 0.013    | 0.421          | 17,000 | 32,000   | 24,000   | 55,000   | 5,000      | 5,000      | 0.175         |
| XP 001119899IPREDICTED: similar to CG31618-PA [Apis mellifera]                                                | 0.013    | 0.421          | 17,000 | 32,000   | 24,000   | 55,000   | 5,000      | 5,000      | 0.188         |
| XP 395047IPREDICTED: similar to Phosphoglucate kinase isoform 1 [Apis mellifera]                              | 0.014    | 0.841          | 11,000 | 26,000   | 29,000   | 55,000   | 5,000      | 5,000      | 0.198         |
| XP 001120262IPREDICTED: similar to Actin 88F CG5178-PA [Apis mellifera]                                       | 0.014    | 0.841          | 14,000 | 29,000   | 26,000   | 55,000   | 5,000      | 5,000      | 0.214         |
| XP 624204IPREDICTED: similar to Lysal serum protein 2 CG5806-PA [Apis mellifera]                              | 0.014    | 0.690          | 15,000 | 30,000   | 26,000   | 55,000   | 5,000      | 5,000      | 0.167         |
| XP 392618IPREDICTED: similar to CG6342-PA [Apis mellifera]                                                    | 0.016    | 0.010          | 18,000 | 39,000   | 57,000   | 55,000   | 5,000      | 5,000      | 0.206         |
| XP 624806IPREDICTED: similar to CG7217-PB isoform B [Apis mellifera]                                          | 0.016    | 0.841          | 14,000 | 29,000   | 26,000   | 55,000   | 5,000      | 5,000      | 0.198         |
| XP 623432IPREDICTED: similar to Aldolase CG6058-PF isoform F [Apis mellifera]                                 | 0.017    | 0.421          | 17,000 | 32,000   | 24,000   | 55,000   | 5,000      | 5,000      | 0.206         |
| NP 00101188IPREDICTED: royal jelly protein 2 [Apis mellifera]                                                 | 0.018    | 0.548          | 16,000 | 31,000   | 24,000   | 55,000   | 5,000      | 5,000      | 0.190         |
| XP 392898IPREDICTED: similar to Calreticulin CG3423-PA isoform 1 [Apis mellifera]                             | 0.020    | 0.841          | 14,000 | 29,000   | 26,000   | 55,000   | 5,000      | 5,000      | 0.167         |
| NP 001011601IPREDICTED: major royal jelly protein 3 [Apis mellifera]                                          | 0.021    | 0.095          | 21,000 | 36,000   | 19,000   | 55,000   | 5,000      | 5,000      | 0.190         |
| XP 392478IPREDICTED: similar to mitochondrial malate dehydrogenase precursor isoform 1 [Apis mellifera]       | 0.022    | 0.421          | 8,000  | 23,000   | 32,000   | 55,000   | 5,000      | 5,000      | 0.190         |
| XP 392450IPREDICTED: similar to Muscic protein 20 CG4595-PA isoform A [Apis mellifera]                        | 0.022    | 0.548          | 16,000 | 31,000   | 24,000   | 55,000   | 5,000      | 5,000      | 0.190         |
| XP 001121015IPREDICTED: similar to HLA-B-associated transactin 3 [Apis mellifera]                             | 0.023    | 0.548          | 16,000 | 31,000   | 24,000   | 55,000   | 5,000      | 5,000      | 0.206         |
| XP 392618IPREDICTED: similar to apotic CG3383-PB isoform B [Apis mellifera]                                   | 0.022    | 6,000          | 21,000 | 34,000   | 55,000   | 5,000    | 5,000      | 0.190      |               |
| XP 623198IPREDICTED: similar to Hsp70C CG6603-PA isoform A isoform 1 [Apis mellifera]                         | 0.024    | 0.056          | 3,000  | 18,000   | 37,000   | 55,000   | 5,000      | 5,000      | 0.206         |
| XP 623487IPREDICTED: similar to Actin 87E isoform 2 [Apis mellifera]                                          | 0.026    | 0.548          | 16,000 | 31,000   | 24,000   | 55,000   | 5,000      | 5,000      | 0.190         |
| XP 624730IPREDICTED: similar to Actin 88F CG5178-PA [Apis mellifera]                                          | 0.027    | 0.548          | 16,000 | 31,000   | 24,000   | 55,000   | 5,000      | 5,000      | 0.190         |
| XP 623618IPREDICTED: similar to Actin 87E isoform 1 [Apis mellifera]                                          | 0.028    | 0.548          | 16,000 | 31,000   | 24,000   | 55,000   | 5,000      | 5,000      | 0.198         |
| XP 623826IPREDICTED: similar to Actin 87E isoform 1 [Apis mellifera]                                          | 0.027    | 0.548          | 16,000 | 31,000   | 24,000   | 55,000   | 5,000      | 5,000      | 0.206         |
| XP 623894IPREDICTED: similar to Actin 87E isoform 2 [Apis mellifera]                                          | 0.027    | 0.548          | 16,000 | 31,000   | 24,000   | 55,000   | 5,000      | 5,000      | 0.198         |
| XP 624381IPREDICTED: similar to Actin-5C isoform 2 [Apis mellifera]                                           | 0.029    | 0.548          | 16,000 | 31,000   | 24,000   | 55,000   | 5,000      | 5,000      | 0.190         |
| XP 393368IPREDICTED: similar to Actin-5C isoform 1 [Apis mellifera]                                           | 0.029    | 0.548          | 16,000 | 31,000   | 24,000   | 55,000   | 5,000      | 5,000      | 0.198         |
| XP 397201IPREDICTED: similar to CG6469-PA [Apis mellifera]                                                    | 0.031    | 0.310          | 7,000  | 22,000   | 33,000   | 55,000   | 5,000      | 5,000      | 0.206         |
| XP 623282IPREDICTED: similar to ERp60 CG8983-PA isoform A isoform 2 [Apis mellifera]                          | 0.032    | 0.421          | 17,000 | 32,000   | 24,000   | 55,000   | 5,000      | 5,000      | 0.190         |
| XP 392478IPREDICTED: similar to CG8798-PA isoform A [Apis mellifera]                                          | 0.033    | 0.841          | 11,000 | 26,000   | 29,000   | 55,000   | 5,000      | 5,000      | 0.206         |
| XP 001122747IPREDICTED: similar to yellow-2 CG17044-PA [Apis mellifera]                                       | 0.034    | 0.151          | 20,000 | 35,000   | 29,000   | 55,000   | 5,000      | 5,000      | 0.167         |
| XP 623130IPREDICTED: similar to heat shock protein 8 isoform 1 [Apis mellifera]                               | 0.035    | 1.000          | 13,000 | 28,000   | 27,000   | 55,000   | 5,000      | 5,000      | 0.206         |
| XP 623084IPREDICTED: similar to Aldohexose dehydrogenase CG3752-PA isoform 1 [Apis mellifera]                 | 0.041    | 0.548          | 16,000 | 31,000   | 24,000   | 55,000   | 5,000      | 5,000      | 0.190         |
| XP 394038IPREDICTED: similar to tubulin beta 2 [Apis mellifera]                                               | 0.042    | 0.421          | 8,000  | 23,000   | 32,000   | 55,000   | 5,000      | 5,000      | 0.206         |
| XP 624158IPREDICTED: similar to ATP synthase CG1154-PA isoform A [Apis mellifera]                             | 0.045    | 0.110          | 18,000 | 39,000   | 57,000   | 55,000   | 5,000      | 5,000      | 0.167         |
| XP 392933IPREDICTED: similar to heat shock protein 8 isoform 1 [Apis mellifera]                               | 0.052    | 0.841          | 11,000 | 26,000   | 29,000   | 55,000   | 5,000      | 5,000      | 0.190         |
| XP 626018IPREDICTED: similar to Actin-5C [Apis mellifera]                                                     | 0.056    | 0.222          | 19,000 | 34,000   | 21,000   | 55,000   | 5,000      | 5,000      | 0.198         |
| XP 001121108IPREDICTED: similar to T0C17.5 - partial [Apis mellifera]                                         | 0.058    | 0.410          | 18,000 | 33,000   | 22,000   | 55,000   | 5,000      | 5,000      | 0.238         |
| XP 393099IPREDICTED: similar to Heat shock protein cognate 3 CG4147-PA isoform A [Apis mellifera]             | 0.062    | 0.110          | 18,000 | 39,000   | 57,000   | 55,000   | 5,000      | 5,000      | 0.190         |
| XP 625004IPREDICTED: similar to CG15006-PA [Apis mellifera]                                                   | 0.078    | 0.095          | 4,000  | 19,000   | 36,000   | 55,000   | 5,000      | 5,000      | 0.190         |
| XP 623555IPREDICTED: similar to Nascent polypeptide associated complex protein alpha subunit CG8759-PB        | 0.082    | 1.000          | 13,000 | 28,000   | 27,000   | 55,000   | 5,000      | 5,000      | 0.198         |
| XP 395475IPREDICTED: similar to Protein lethal 2 essential for life (Protein LE21) isoform 1 [Apis mellifera] | 0.085    | 0.151          | 20,000 | 35,000   | 20,000   | 55,000   | 5,000      | 5,000      | 0.206         |
| XP 001122695IPREDICTED: similar to CG3384-PB isoform B [Apis mellifera]                                       | 0.092    | 0.421          | 17,000 | 32,000   | 24,000   | 55,000   | 5,000      | 5,000      | 0.190         |
| XP 396268IPREDICTED: similar to CG3523-PA [Apis mellifera]                                                    | 0.111    | 0.548          | 16,000 | 31,000   | 24,000   | 55,000   | 5,000      | 5,000      | 0.198         |
| XP 623048IPREDICTED: similar to Troponomyosin 1 CG4898-PD isoform D [Apis mellifera]                          | 0.112    | 1.000          | 13,000 | 28,000   | 27,000   | 55,000   | 5,000      | 5,000      | 0.214         |
| XP 001121072IPREDICTED: similar to CG3244-PA [Apis mellifera]                                                 | 0.126    | 0.841          | 14,000 | 29,000   | 26,000   | 55,000   | 5,000      | 5,000      | 0.190         |
| XP 393338IPREDICTED: similar to Myosin heavy chain CG17927-PB isoform B isoform 1 [Apis mellifera]            | 0.127    | 0.841          | 14,000 | 29,000   | 26,000   | 55,000   | 5,000      | 5,000      | 0.168         |
| XP 393338IPREDICTED: similar to Myosin heavy chain CG17927-PB isoform B isoform 1 [Apis mellifera]            | 0.127    | 0.841          | 14,000 | 29,000   | 26,000   | 55,000   | 5,000      | 5,000      | 0.198         |
| NP 0010114993IPREDICTED: factor 1, alpha [Apis mellifera]                                                     | 0.139    | 0.548          | 16,000 | 31,000   | 24,000   | 55,000   | 5,000      | 5,000      | 0.190         |
| XP 623232IPREDICTED: similar to zipper CG15792-PD isoform D [Apis mellifera]                                  | 0.154    | 0.841          | 14,000 | 29,000   | 26,000   | 55,000   | 5,000      | 5,000      | 0.175         |
| XP 394199IPREDICTED: similar to Tubulin alpha-B chain (Alpha-tubulin b)                                       | 0.168    | 0.421          | 17,000 | 32,000   | 24,000   | 55,000   | 5,000      | 5,000      | 0.167         |
| XP 001123088IPREDICTED: similar to tubulin alpha 1 [Apis mellifera]                                           | 0.180    | 0.421          | 17,000 | 32,000   | 24,000   | 55,000   | 5,000      | 5,000      | 0.198         |
| XP 392126IPREDICTED: similar to Troponomyosin 1 CG4898-PD isoform D isoform 1 [Apis mellifera]                | 0.189    | 1.000          | 12,000 | 27,000   | 28,000   | 55,000   | 5,000      | 5,000      | 0.206         |
| XP 392406IPREDICTED: similar to CG14207-PB isoform B isoform 1 [Apis mellifera]                               | 0.174    | 0.310          | 7,000  | 22,000   | 33,000   | 55,000   | 5,000      | 5,000      | 0.190         |
| XP 623938IPREDICTED: similar to heat shock protein 90-alpha isoform 2 [Apis mellifera]                        | 0.188    | 0.222          | 19,000 | 34,000   | 21,000   | 55,000   | 5,000      | 5,000      | 0.214         |
| XP 623456IPREDICTED: similar to heat shock protein 1 beta isoform 1 [Apis mellifera]                          | 0.193    | 0.222          | 19,000 | 34,000   | 21,000   | 55,000   | 5,000      | 5,000      | 0.198         |
| XP 624767IPREDICTED: hypothetical protein [Apis mellifera]                                                    | 0.198    | 1.000          | 13,000 | 28,000   | 27,000   | 55,000   | 5,000      | 5,000      | 0.151         |
| XP 623470IPREDICTED: similar to Troponomyosin 1 CG4898-PB isoform 2 [Apis mellifera]                          | 0.204    | 1.000          | 12,000 | 27,000   | 28,000   | 55,000   | 5,000      | 5,000      | 0.161         |
| XP 001121022IPREDICTED: hypothetical protein [Apis mellifera]                                                 | 0.204    | 0.310          | 7,000  | 22,000   | 33,000   | 55,000   | 5,000      | 5,000      | 0.198         |
| XP 001123434IPREDICTED: similar to Tubulin alpha 3 chain (Alpha-tubulin 3) - partial [Apis mellifera]         | 0.210    | 0.690          | 15,000 | 30,000   | 26,000   | 55,000   | 5,000      | 5,000      | 0.190         |
| NP 001011628IPREDICTED: translation elongation factor eIF-1 alpha chain [Apis mellifera]                      | 0.222    | 0.222          | 19,000 | 34,000   | 21,000   | 55,000   | 5,000      | 5,000      | 0.167         |
| XP 393371IPREDICTED: similar to Myosin regulatory light chain 2 (MLC-2) [Apis mellifera]                      | 0.226    | 1.000          | 12,000 | 28,000   | 27,000   | 55,000   | 5,000      | 5,000      | 0.198         |
| XP 001121168IPREDICTED: similar to CG32405-PA [Apis mellifera]                                                | 0.235    | 0.095          | 21,000 | 36,000   | 19,000   | 55,000   | 5,000      | 5,000      | 0.206         |
| XP 392929IPREDICTED: similar to kinesin 1 [Apis mellifera]                                                    | 0.261    | 0.548          | 16,000 | 31,000   | 24,000   | 55,000   | 5,000      | 5,000      | 0.190         |
| NP 001011600IPREDICTED: hexamerin 70b [Apis mellifera]                                                        | 0.269    | 1.000          | 13,000 | 28,000   | 27,000   | 55,000   | 5,000      | 5,000      | 0.190         |
| XP 624361IPREDICTED: similar to Peroxisome 2540 CG11765-PA [Apis mellifera]                                   | 0.300    | 0.151          | 20,000 | 35,000   | 20,000   | 55,000   | 5,000      | 5,000      | 0.190         |
| XP 395571IPREDICTED: similar to Dodeca-satellite-binding protein 1 CG5170-FC isoform C [Apis mellifera]       | 0.304    | 0.690          | 15,000 | 30,000   | 26,000   | 55,000   | 5,000      | 5,000      | 0.206         |
| XP 395141IPREDICTED: similar to Cytochrome b3 CG5520-PA isoform 1 [Apis mellifera]                            | 0.323    | 0.421          | 17,000 | 32,000   | 24,000   | 55,000   | 5,000      | 5,000      | 0.190         |
| XP 392313IPREDICTED: similar to Tubulin at 560 CG3277-PB isoform B [Apis mellifera]                           | 0.354    | 0.151          | 5,000  | 20,000   | 35,000   | 55,000   | 5,000      | 5,000      | 0.190         |
| NP 0010114429IPREDICTED: major royal jelly protein 7 [Apis mellifera]                                         | 0.359    | 0.690          | 15,000 | 30,000   | 26,000   | 55,000   | 5,000      | 5,000      | 0.206         |
| XP 391361IPREDICTED: similar to Troponomyosin 2 CG4843-PB isoform B [Apis mellifera]                          | 0.374    | 0.421          | 8,000  | 23,000   | 32,000   | 55,000   | 5,000      | 5,000      | 0.198         |
| XP 624339IPREDICTED: similar to Troponomyosin 1 CG4898-PD isoform 1 [Apis mellifera]                          | 0.415    | 0.841          | 14,000 | 29,000   | 26,000   | 55,000   | 5,000      | 5,000      | 0.190         |
| XP 001122917IPREDICTED: hypothetical protein [Apis mellifera]                                                 | 0.422    | 6,000          | 21,000 | 34,000   | 55,000   | 5,000    | 5,000      | 0.206      |               |
| XP 392147IPREDICTED: similar to Heat shock protein cognate 5 CG8542-PA [Apis mellifera]                       | 0.464    | 0.548          | 16,000 | 31,000   | 24,000   | 55,000   | 5,000      | 5,000      | 0.190         |
| XP 623298IPREDICTED: similar to Troponomyosin 1 CG4898-PA isoform A [Apis mellifera]                          | 0.519    | 1.000          | 12,000 | 27,000   | 28,000   | 55,000   | 5,000      | 5,000      | 0.214         |
| NP 001035313IPREDICTED: invariant binding protein 14 [Apis mellifera]                                         | 0.527    | 0.841          | 14,000 | 29,000   | 26,000   | 55,000   | 5,000      | 5,000      | 0.174         |
| XP 001123471IPREDICTED: similar to 3-hydroxyacyl-CoA dehydrogenase hsp-2                                      | 0.536    | 0.690          | 15,000 | 30,000   | 26,000   | 55,000   | 5,000      | 5,000      | 0.198         |
| XP 623083IPREDICTED: similar to ATP citrate lyase CG8322-PA isoform A isoform 1 [Apis mellifera]              | 0.559    | 0.222          | 19,000 | 34,000   | 21,000   | 55,000   | 5,000      | 5,000      | 0.198         |
| XP 623156IPREDICTED: similar to ATP citrate lyase CG8322-PA isoform A isoform 2 [Apis mellifera]              | 0.559    | 0.222          | 19,000 | 34,000   | 21,000   | 55,000   | 5,000      | 5,000      | 0.198         |
| XP 624781IPREDICTED: similar to 60S acidic ribosomal protein P1 (RP21C)                                       | 0.568    | 0.421          | 8,000  | 23,000   | 32,000   | 55,000   | 5,000      | 5,000      | 0.206         |
| XP 392313IPREDICTED: similar to Superoxide dismutase CG11783-PA isoform 1 [Apis mellifera]                    | 0.603    | 1.000          | 12,000 | 28,000   | 27,000   | 55,000   | 5,000      | 5,000      | 0.198         |
| XP 394466IPREDICTED: similar to Tubulin at 600 CG3401-PA [Apis mellifera]                                     | 0.608    | 0.421          | 8,000  | 23,000   | 32,000   | 55,000   | 5,000      | 5,000      | 0.190         |
| XP 396338IPREDICTED: similar to Tubulin alpha-1 chain [Apis mellifera]                                        | 0.658    | 0.548          | 16,000 | 31,000   | 24,000   |          |            |            |               |

| Protein description                                                                                           | KWvalue | IRS/Control<br>pvalue | U      | sample 1<br>Rank sum | sample 2<br>Rank sum | Total<br>Rank sum | sample 1<br>Replicates | sample 2<br>Replicates | pvalue cutoff |
|---------------------------------------------------------------------------------------------------------------|---------|-----------------------|--------|----------------------|----------------------|-------------------|------------------------|------------------------|---------------|
| XP 621194IPREDICTED: similar to CG6180-PA isoform 2 [Apis mellifera]                                          | 0.002   | 0.008                 | 25,000 | 49,000               | 16,000               | 55,000            | 5,000                  | 5,000                  | 0.198         |
| XP 392600IPREDICTED: similar to CG6180-PA isoform 1 [Apis mellifera]                                          | 0.002   | 0.008                 | 25,000 | 49,000               | 16,000               | 55,000            | 5,000                  | 5,000                  | 0.198         |
| XP 001122907IPREDICTED: similar to Cco84Ad CG2341-PA [Apis mellifera]                                         | 0.003   | 0.008                 | 25,000 | 49,000               | 16,000               | 55,000            | 5,000                  | 5,000                  | 0.198         |
| XP 624310IPREDICTED: similar to CG11267-PA [Apis mellifera]                                                   | 0.005   | 0.095                 | 21,000 | 36,000               | 19,000               | 55,000            | 5,000                  | 5,000                  | 0.208         |
| XP 001121209IPREDICTED: similar to CG32405-PA [Apis mellifera]                                                | 0.007   | 0.039                 | 17,000 | 38,000               | 55,000               | 5,000             | 5,000                  | 0.198                  |               |
| XP 624829IPREDICTED: similar to CG2605-PB isoform B [Apis mellifera]                                          | 0.009   | 0.009                 | 25,000 | 49,000               | 16,000               | 55,000            | 5,000                  | 5,000                  | 0.198         |
| XP 393445IPREDICTED: similar to thioredoxin peroxidase 1 CG1633-PA isoform 1 [Apis mellifera]                 | 0.011   | 0.016                 | 24,000 | 39,000               | 16,000               | 55,000            | 5,000                  | 5,000                  | 0.208         |
| XP 001120186IPREDICTED: similar to CG31618-PA [Apis mellifera]                                                | 0.012   | 0.016                 | 24,000 | 39,000               | 16,000               | 55,000            | 5,000                  | 5,000                  | 0.198         |
| XP 001122414IPREDICTED: similar to CG31206-PA [Apis mellifera]                                                | 0.013   | 0.016                 | 24,000 | 39,000               | 16,000               | 55,000            | 5,000                  | 5,000                  | 0.167         |
| XP 624700IPREDICTED: similar to CG31618-PA [Apis mellifera]                                                   | 0.013   | 0.016                 | 24,000 | 39,000               | 16,000               | 55,000            | 5,000                  | 5,000                  | 0.208         |
| XP 001120934IPREDICTED: similar to CG31618-PA [Apis mellifera]                                                | 0.013   | 0.016                 | 24,000 | 39,000               | 16,000               | 55,000            | 5,000                  | 5,000                  | 0.167         |
| XP 001120348IPREDICTED: similar to CG31618-PA [Apis mellifera]                                                | 0.013   | 0.016                 | 24,000 | 39,000               | 16,000               | 55,000            | 5,000                  | 5,000                  | 0.198         |
| XP 001119399IPREDICTED: similar to CG31618-PA [Apis mellifera]                                                | 0.013   | 0.016                 | 24,000 | 39,000               | 16,000               | 55,000            | 5,000                  | 5,000                  | 0.198         |
| XP 395243IPREDICTED: similar to Phosphoserine kinase isoform 1 [Apis mellifera]                               | 0.014   | 0.016                 | 24,000 | 39,000               | 16,000               | 55,000            | 5,000                  | 5,000                  | 0.198         |
| XP 001120262IPREDICTED: similar to Actin 88F CG5178-PA [Apis mellifera]                                       | 0.014   | 0.056                 | 3,000  | 18,000               | 37,000               | 55,000            | 5,000                  | 5,000                  | 0.198         |
| XP 624041IPREDICTED: similar to Larval serum protein 2 CG6806-PA [Apis mellifera]                             | 0.014   | 0.016                 | 1,000  | 16,000               | 39,000               | 55,000            | 5,000                  | 5,000                  | 0.198         |
| XP 392281IPREDICTED: similar to CG8424n CG2342-PA [Apis mellifera]                                            | 0.015   | 0.016                 | 24,000 | 39,000               | 16,000               | 55,000            | 5,000                  | 5,000                  | 0.208         |
| XP 624300IPREDICTED: similar to CG3717-PB isoform B [Apis mellifera]                                          | 0.015   | 0.016                 | 1,000  | 16,000               | 39,000               | 55,000            | 5,000                  | 5,000                  | 0.198         |
| XP 623432IPREDICTED: similar to Aldolase CG6058-PF isoform F [Apis mellifera]                                 | 0.017   | 0.016                 | 1,000  | 16,000               | 39,000               | 55,000            | 5,000                  | 5,000                  | 0.198         |
| NP 001011580major royal jelly protein 2 [Apis mellifera]                                                      | 0.019   | 0.016                 | 1,000  | 16,000               | 39,000               | 55,000            | 5,000                  | 5,000                  | 0.198         |
| XP 392899IPREDICTED: similar to Calreticulin CG3429-PA isoform 1 [Apis mellifera]                             | 0.020   | 0.016                 | 1,000  | 16,000               | 39,000               | 55,000            | 5,000                  | 5,000                  | 0.198         |
| NP 001011601major royal jelly protein 3 [Apis mellifera]                                                      | 0.021   | 0.056                 | 4,000  | 19,000               | 36,000               | 55,000            | 5,000                  | 5,000                  | 0.208         |
| XP 392478IPREDICTED: similar to mitochondrial malate dehydrogenase precursor isoform 1 [Apis mellifera]       | 0.022   | 0.095                 | 21,000 | 36,000               | 19,000               | 55,000            | 5,000                  | 5,000                  | 0.198         |
| XP 392501IPREDICTED: similar to Muscle protein 20 CG4696-PA [Apis mellifera]                                  | 0.022   | 0.032                 | 23,000 | 38,000               | 17,000               | 55,000            | 5,000                  | 5,000                  | 0.198         |
| XP 001121018IPREDICTED: similar to HLA-B-associated transcript 3 [Apis mellifera]                             | 0.023   | 0.032                 | 23,000 | 38,000               | 17,000               | 55,000            | 5,000                  | 5,000                  | 0.175         |
| XP 392616IPREDICTED: similar to argonin CG593-PB [Apis mellifera]                                             | 0.023   | 0.032                 | 23,000 | 38,000               | 17,000               | 55,000            | 5,000                  | 5,000                  | 0.198         |
| XP 623589IPREDICTED: similar to Hsc70Ch CG3663-PA isoform A isoform 1 [Apis mellifera]                        | 0.024   | 1.000                 | 13,000 | 28,000               | 27,000               | 55,000            | 5,000                  | 5,000                  | 0.198         |
| XP 623487IPREDICTED: similar to Actin-87E isoform 2 [Apis mellifera]                                          | 0.024   | 0.151                 | 5,000  | 20,000               | 35,000               | 55,000            | 5,000                  | 5,000                  | 0.198         |
| XP 623476IPREDICTED: similar to Actin 88F CG5178-PA [Apis mellifera]                                          | 0.027   | 0.222                 | 6,000  | 21,000               | 34,000               | 55,000            | 5,000                  | 5,000                  | 0.198         |
| XP 623483IPREDICTED: similar to Actin-87E isoform 1 [Apis mellifera]                                          | 0.027   | 0.222                 | 6,000  | 21,000               | 34,000               | 55,000            | 5,000                  | 5,000                  | 0.198         |
| XP 623482IPREDICTED: similar to Actin-87E isoform 1 [Apis mellifera]                                          | 0.027   | 0.222                 | 6,000  | 21,000               | 34,000               | 55,000            | 5,000                  | 5,000                  | 0.198         |
| XP 623694IPREDICTED: similar to Actin-87E isoform 2 [Apis mellifera]                                          | 0.027   | 0.222                 | 6,000  | 21,000               | 34,000               | 55,000            | 5,000                  | 5,000                  | 0.167         |
| XP 623381IPREDICTED: similar to Actin-SC isoform 2 [Apis mellifera]                                           | 0.029   | 0.222                 | 6,000  | 21,000               | 34,000               | 55,000            | 5,000                  | 5,000                  | 0.198         |
| XP 393438IPREDICTED: similar to Actin-SC isoform 1 [Apis mellifera]                                           | 0.029   | 0.222                 | 6,000  | 21,000               | 34,000               | 55,000            | 5,000                  | 5,000                  | 0.198         |
| XP 392720IPREDICTED: similar to CG2649-PA [Apis mellifera]                                                    | 0.031   | 0.056                 | 4,000  | 19,000               | 37,000               | 55,000            | 5,000                  | 5,000                  | 0.198         |
| XP 623282IPREDICTED: similar to Etb60 CG5883-PA isoform A isoform 2 [Apis mellifera]                          | 0.032   | 0.016                 | 24,000 | 39,000               | 16,000               | 55,000            | 5,000                  | 5,000                  | 0.198         |
| XP 392970IPREDICTED: similar to CG8788-PB isoform A [Apis mellifera]                                          | 0.033   | 0.032                 | 23,000 | 38,000               | 17,000               | 55,000            | 5,000                  | 5,000                  | 0.198         |
| XP 001121275IPREDICTED: similar to yellow-42 CG1744-PA [Apis mellifera]                                       | 0.033   | 0.151                 | 5,000  | 20,000               | 35,000               | 55,000            | 5,000                  | 5,000                  | 0.198         |
| XP 623130IPREDICTED: similar to heat shock protein 8 isoform 1 [Apis mellifera]                               | 0.033   | 0.032                 | 23,000 | 38,000               | 17,000               | 55,000            | 5,000                  | 5,000                  | 0.198         |
| XP 623084IPREDICTED: similar to Aldehyde dehydrogenase CG3752-PA isoform 1 [Apis mellifera]                   | 0.041   | 0.032                 | 2,000  | 17,000               | 38,000               | 55,000            | 5,000                  | 5,000                  | 0.198         |
| XP 394038IPREDICTED: similar to tubulin beta 2 [Apis mellifera]                                               | 0.044   | 0.032                 | 23,000 | 38,000               | 17,000               | 55,000            | 5,000                  | 5,000                  | 0.198         |
| XP 624150IPREDICTED: similar to ATP synthase CG1115-PA isoform A [Apis mellifera]                             | 0.051   | 0.032                 | 23,000 | 38,000               | 17,000               | 55,000            | 5,000                  | 5,000                  | 0.167         |
| XP 623933IPREDICTED: similar to heat shock protein 8 isoform 1 [Apis mellifera]                               | 0.052   | 0.032                 | 23,000 | 38,000               | 17,000               | 55,000            | 5,000                  | 5,000                  | 0.198         |
| XP 625018IPREDICTED: similar to Actin-SC [Apis mellifera]                                                     | 0.055   | 0.310                 | 7,000  | 22,000               | 33,000               | 55,000            | 5,000                  | 5,000                  | 0.198         |
| NP 001121108IPREDICTED: similar to T04C12.5, partial [Apis mellifera]                                         | 0.059   | 0.222                 | 6,000  | 21,000               | 34,000               | 55,000            | 5,000                  | 5,000                  | 0.198         |
| XP 392909IPREDICTED: similar to Heat shock protein cognate 3 CG4147-PA isoform A [Apis mellifera]             | 0.065   | 0.016                 | 24,000 | 39,000               | 16,000               | 55,000            | 5,000                  | 5,000                  | 0.198         |
| XP 624501IPREDICTED: similar to CG14906-PA [Apis mellifera]                                                   | 0.072   | 0.222                 | 6,000  | 21,000               | 34,000               | 55,000            | 5,000                  | 5,000                  | 0.221         |
| XP 623555IPREDICTED: similar to Nascent polypeptide associated complex protein alpha subunit CG8759-PB        | 0.082   | 0.151                 | 5,000  | 20,000               | 35,000               | 55,000            | 5,000                  | 5,000                  | 0.198         |
| XP 393575IPREDICTED: similar to Protein lethal/2 essential for life [Protein E011] isoform 1 [Apis mellifera] | 0.085   | 0.151                 | 5,000  | 20,000               | 35,000               | 55,000            | 5,000                  | 5,000                  | 0.198         |
| XP 001122692IPREDICTED: similar to CG3884-PB isoform B [Apis mellifera]                                       | 0.092   | 0.056                 | 22,000 | 37,000               | 18,000               | 55,000            | 5,000                  | 5,000                  | 0.198         |
| XP 392686IPREDICTED: similar to CG3563-PA [Apis mellifera]                                                    | 0.111   | 0.151                 | 5,000  | 20,000               | 35,000               | 55,000            | 5,000                  | 5,000                  | 0.198         |
| XP 623046IPREDICTED: similar to Troponin-1 CG4898-PD isoform D [Apis mellifera]                               | 0.112   | 0.016                 | 24,000 | 39,000               | 16,000               | 55,000            | 5,000                  | 5,000                  | 0.198         |
| XP 001121022IPREDICTED: similar to CG32446-PA [Apis mellifera]                                                | 0.126   | 0.016                 | 24,000 | 39,000               | 16,000               | 55,000            | 5,000                  | 5,000                  | 0.198         |
| XP 393334IPREDICTED: similar to Myosin heavy chain CG17927-PB isoform B isoform 1 [Apis mellifera]            | 0.127   | 0.095                 | 21,000 | 36,000               | 19,000               | 55,000            | 5,000                  | 5,000                  | 0.198         |
| XP 393381IPREDICTED: similar to Cytochrome 1 CG39116-PA [Apis mellifera]                                      | 0.132   | 0.032                 | 23,000 | 38,000               | 17,000               | 55,000            | 5,000                  | 5,000                  | 0.175         |
| NP 001014993elongation factor 1 alpha [Apis mellifera]                                                        | 0.133   | 0.032                 | 23,000 | 38,000               | 17,000               | 55,000            | 5,000                  | 5,000                  | 0.167         |
| XP 623329IPREDICTED: similar to zipper CG15792-PD isoform D [Apis mellifera]                                  | 0.154   | 0.095                 | 21,000 | 36,000               | 19,000               | 55,000            | 5,000                  | 5,000                  | 0.198         |
| XP 394991IPREDICTED: similar to Tubulin alpha-6 chain [Alpha-tubulin 6]                                       | 0.164   | 0.008                 | 25,000 | 49,000               | 16,000               | 55,000            | 5,000                  | 5,000                  | 0.198         |
| XP 001121008IPREDICTED: similar to tubulin alpha 1 [Apis mellifera]                                           | 0.164   | 0.056                 | 22,000 | 37,000               | 18,000               | 55,000            | 5,000                  | 5,000                  | 0.214         |
| XP 392122IPREDICTED: similar to Troponin-1 CG4898-PD isoform A isoform 1 [Apis mellifera]                     | 0.165   | 0.032                 | 23,000 | 38,000               | 17,000               | 55,000            | 5,000                  | 5,000                  | 0.198         |
| XP 392426IPREDICTED: similar to CG14207-PB isoform B isoform 1 [Apis mellifera]                               | 0.172   | 0.690                 | 15,000 | 30,000               | 26,000               | 55,000            | 5,000                  | 5,000                  | 0.198         |
| XP 623939IPREDICTED: similar to heat shock protein 90-alpha isoform 2 [Apis mellifera]                        | 0.188   | 0.008                 | 49,000 | 49,000               | 16,000               | 55,000            | 5,000                  | 5,000                  | 0.198         |
| XP 392459IPREDICTED: similar to heat shock protein 1 beta isoform 1 [Apis mellifera]                          | 0.188   | 0.008                 | 25,000 | 49,000               | 16,000               | 55,000            | 5,000                  | 5,000                  | 0.198         |
| XP 624727IPREDICTED: similar to hypothetical protein [Apis mellifera]                                         | 0.188   | 0.016                 | 5,000  | 20,000               | 35,000               | 55,000            | 5,000                  | 5,000                  | 0.198         |
| XP 623470IPREDICTED: similar to Troponin-1 CG4898-PB isoform B isoform 2 [Apis mellifera]                     | 0.204   | 0.095                 | 4,000  | 19,000               | 36,000               | 55,000            | 5,000                  | 5,000                  | 0.198         |
| NP 001120220IPREDICTED: hypothetical protein [Apis mellifera]                                                 | 0.204   | 0.032                 | 2,000  | 17,000               | 38,000               | 55,000            | 5,000                  | 5,000                  | 0.198         |
| XP 001121044IPREDICTED: similar to Tubulin alpha 3 chain [Alpha-tubulin 3], partial [Apis mellifera]          | 0.220   | 0.151                 | 20,000 | 35,000               | 20,000               | 55,000            | 5,000                  | 5,000                  | 0.198         |
| XP 001116218inactivated elongation factor 2 alpha chain [Apis mellifera]                                      | 0.227   | 0.032                 | 23,000 | 38,000               | 17,000               | 55,000            | 5,000                  | 5,000                  | 0.198         |
| XP 393371IPREDICTED: similar to Myosin regulatory light chain 2 [MLC-2] [Apis mellifera]                      | 0.228   | 0.310                 | 18,000 | 33,000               | 22,000               | 55,000            | 5,000                  | 5,000                  | 0.198         |
| XP 001121168IPREDICTED: similar to CG32405-PA [Apis mellifera]                                                | 0.235   | 0.690                 | 10,000 | 25,000               | 30,000               | 55,000            | 5,000                  | 5,000                  | 0.208         |
| XP 392929IPREDICTED: similar to kinesin 1 [Apis mellifera]                                                    | 0.261   | 0.222                 | 19,000 | 34,000               | 21,000               | 55,000            | 5,000                  | 5,000                  | 0.198         |
| NP 001011600hexamerin 70b [Apis mellifera]                                                                    | 0.269   | 0.421                 | 17,000 | 32,000               | 23,000               | 55,000            | 5,000                  | 5,000                  | 0.208         |
| XP 624361IPREDICTED: similar to Peroxidoxin 2540 CG11765-PA [Apis mellifera]                                  | 0.300   | 0.056                 | 22,000 | 37,000               | 18,000               | 55,000            | 5,000                  | 5,000                  | 0.198         |
| XP 395577IPREDICTED: similar to Dodeca-satellite-binding protein 1 CG5170-FC isoform C [Apis mellifera]       | 0.304   | 0.151                 | 20,000 | 35,000               | 20,000               | 55,000            | 5,000                  | 5,000                  | 0.208         |
| XP 395614IPREDICTED: similar to Glucanase B3 CG5520-PA isoform 1 [Apis mellifera]                             | 0.328   | 0.421                 | 8,000  | 23,000               | 32,000               | 55,000            | 5,000                  | 5,000                  | 0.198         |
| XP 392313IPREDICTED: similar to Tubulin alpha 560 CG3277-PB isoform B [Apis mellifera]                        | 0.354   | 0.690                 | 15,000 | 30,000               | 26,000               | 55,000            | 5,000                  | 5,000                  | 0.198         |
| NP 001014429major royal jelly protein 7 [Apis mellifera]                                                      | 0.359   | 0.310                 | 7,000  | 22,000               | 33,000               | 55,000            | 5,000                  | 5,000                  | 0.198         |
| XP 391961IPREDICTED: similar to Troponin-2 CG4843-PB isoform B [Apis mellifera]                               | 0.374   | 0.151                 | 5,000  | 20,000               | 35,000               | 55,000            | 5,000                  | 5,000                  | 0.198         |
| XP 623383IPREDICTED: similar to Troponin-2 CG4888-PF isoform 1 [Apis mellifera]                               | 0.415   | 0.222                 | 6,000  | 21,000               | 34,000               | 55,000            | 5,000                  | 5,000                  | 0.208         |
| NP 001122917IPREDICTED: hypothetical protein [Apis mellifera]                                                 | 0.438   | 0.690                 | 10,000 | 25,000               | 30,000               | 55,000            | 5,000                  | 5,000                  | 0.175         |
| XP 392147IPREDICTED: similar to Heat shock protein cognate 5 CG5452-PA [Apis mellifera]                       | 0.454   | 0.690                 | 16,000 | 31,000               | 24,000               | 55,000            | 5,000                  | 5,000                  | 0.208         |
| XP 623298IPREDICTED: similar to Troponin-1 CG4898-PA isoform A [Apis mellifera]                               | 0.519   | 0.151                 | 5,000  | 20,000               | 35,000               | 55,000            | 5,000                  | 5,000                  | 0.198         |
| NP 001035313odorant binding protein 14 [Apis mellifera]                                                       | 0.527   | 0.548                 | 9,000  | 24,000               | 31,000               | 55,000            | 5,000                  | 5,000                  | 0.175         |
| XP 001121047IPREDICTED: similar to 3-hydroxyacyl-CoA dehydrogenase Iyoc-2                                     | 0.538   | 0.151                 | 20,000 | 35,000               | 20,000               | 55,000            | 5,000                  | 5,000                  | 0.208         |
| XP 623083IPREDICTED: similar to ATP citrate lyase CG8322-PA isoform A isoform 1 [Apis mellifera]              | 0.559   | 0.421                 | 17,000 | 32,000               | 23,000               | 55,000            | 5,000                  | 5,000                  | 0.198         |
| XP 623156IPREDICTED: similar to ATP citrate lyase CG8322-PA isoform A isoform 2 [Apis mellifera]              | 0.559   | 0.421                 | 17,000 | 32,000               | 23,000               | 55,000            | 5,000                  | 5,000                  | 0.198         |
| XP 624781IPREDICTED: similar to 60S acidic ribosomal protein P1 [RP21C]                                       | 0.588   | 0.421                 | 17,000 | 32,000               | 23,000               | 55,000            | 5,000                  | 5,000                  | 0.167         |
| XP 392919IPREDICTED: similar to Superoxide dismutase CG1732-PA isoform 1 [Apis mellifera]                     | 0.603   | 0.222                 | 19,000 | 34,000               | 21,000               | 55,000            | 5,000                  | 5,000                  | 0.198         |
| XP 394490IPREDICTED: similar to Tubulin alpha 560 CG3401-PA [Apis mellifera]                                  | 0.603   | 1.000                 | 13,000 | 28,000               | 27,000               | 55,000            | 5,000                  | 5,000                  | 0.198         |
| XP 395338IPREDICTED: similar to Tubulin alpha-1 chain [Apis mellifera]                                        | 0.658   | 0.222                 | 19,000 | 34,000               | 21,000               | 55,000            | 5,000                  | 5,000                  | 0.198         |
| NP 001011603arginine kinase [Apis mellifera]                                                                  | 0.666   | 0.841                 | 11,000 | 26,000               |                      |                   |                        |                        |               |

| Protein description                                                                                            | KWvalue | TOR-(IRS-TOR)<br>pvalue | U      | sample 1<br>Rank sum | sample 2<br>Rank sum | Total<br>Rank sum | sample 1<br>Replicates | sample 2<br>Replicates | pvalue cutoff |
|----------------------------------------------------------------------------------------------------------------|---------|-------------------------|--------|----------------------|----------------------|-------------------|------------------------|------------------------|---------------|
| XP_023154IPREDICTED: similar to CG6180-PA isoform 3 [Aphis mellifera]                                          | 0.002   | 0.016                   | 1,000  | 16,000               | 39,000               | 55,000            | 5,000                  | 5,000                  | 0.190         |
| XP_392060IPREDICTED: similar to CG6180-PA isoform 1 [Aphis mellifera]                                          | 0.002   | 0.016                   | 1,000  | 16,000               | 39,000               | 55,000            | 5,000                  | 5,000                  | 0.198         |
| XP_00112307IPREDICTED: similar to Cco834A CG2341-PA [Aphis mellifera]                                          | 0.003   | 0.030                   | 7,000  | 22,000               | 33,000               | 55,000            | 5,000                  | 5,000                  | 0.208         |
| XP_62491IPREDICTED: similar to CG11267-PA [Aphis mellifera]                                                    | 0.005   | 0.056                   | 4,000  | 19,000               | 36,000               | 55,000            | 5,000                  | 5,000                  | 0.208         |
| XP_00112312IPREDICTED: similar to CG33205-PA [Aphis mellifera]                                                 | 0.007   | 0.056                   | 22,000 | 31,000               | 18,000               | 55,000            | 5,000                  | 5,000                  | 0.198         |
| XP_624628IPREDICTED: similar to CG6206-PB isoform B [Aphis mellifera]                                          | 0.008   | 0.310                   | 7,000  | 22,000               | 33,000               | 55,000            | 5,000                  | 5,000                  | 0.167         |
| XP_393445IPREDICTED: similar to thioredoxin peroxidase 1 CG1633-PA isoform A isoform 1 [Aphis mellifera]       | 0.011   | 0.151                   | 5,000  | 20,000               | 35,000               | 55,000            | 5,000                  | 5,000                  | 0.198         |
| XP_00112318IPREDICTED: similar to CG31618-PA [Aphis mellifera]                                                 | 0.012   | 0.222                   | 6,000  | 21,000               | 34,000               | 55,000            | 5,000                  | 5,000                  | 0.208         |
| XP_00112314IPREDICTED: similar to CG31608-PA [Aphis mellifera]                                                 | 0.013   | 0.160                   | 10,000 | 25,000               | 30,000               | 55,000            | 5,000                  | 5,000                  | 0.208         |
| XP_624700IPREDICTED: similar to CG31618-PA [Aphis mellifera]                                                   | 0.013   | 0.310                   | 7,000  | 22,000               | 33,000               | 55,000            | 5,000                  | 5,000                  | 0.190         |
| XP_001120934IPREDICTED: similar to CG31618-PA [Aphis mellifera]                                                | 0.013   | 0.310                   | 7,000  | 22,000               | 33,000               | 55,000            | 5,000                  | 5,000                  | 0.198         |
| XP_001120346IPREDICTED: similar to CG31618-PA [Aphis mellifera]                                                | 0.013   | 0.310                   | 7,000  | 22,000               | 33,000               | 55,000            | 5,000                  | 5,000                  | 0.190         |
| XP_001119899IPREDICTED: similar to CG31618-PA [Aphis mellifera]                                                | 0.013   | 0.310                   | 7,000  | 22,000               | 33,000               | 55,000            | 5,000                  | 5,000                  | 0.190         |
| XP_395047IPREDICTED: similar to Phosphohydroxyacetate kinase isoform 1 [Aphis mellifera]                       | 0.014   | 0.841                   | 14,000 | 29,000               | 26,000               | 55,000            | 5,000                  | 5,000                  | 0.208         |
| XP_001120262IPREDICTED: similar to Actin 88F CG5178-PA [Aphis mellifera]                                       | 0.014   | 0.310                   | 7,000  | 22,000               | 33,000               | 55,000            | 5,000                  | 5,000                  | 0.190         |
| XP_624041IPREDICTED: similar to Lysal serum protein 2 CG5806-PA [Aphis mellifera]                              | 0.014   | 0.841                   | 11,000 | 26,000               | 29,000               | 55,000            | 5,000                  | 5,000                  | 0.198         |
| XP_392461IPREDICTED: similar to Cco834A CG2342-PA [Aphis mellifera]                                            | 0.014   | 0.841                   | 11,000 | 26,000               | 29,000               | 55,000            | 5,000                  | 5,000                  | 0.198         |
| XP_624806IPREDICTED: similar to CG7217-PB isoform B [Aphis mellifera]                                          | 0.016   | 0.421                   | 8,000  | 23,000               | 32,000               | 55,000            | 5,000                  | 5,000                  | 0.208         |
| XP_623342IPREDICTED: similar to Adolase CG6058-PF isoform F [Aphis mellifera]                                  | 0.017   | 0.841                   | 14,000 | 29,000               | 26,000               | 55,000            | 5,000                  | 5,000                  | 0.190         |
| NP_001011840major royal jelly protein 2 [Aphis mellifera]                                                      | 0.018   | 0.222                   | 19,000 | 34,000               | 21,000               | 55,000            | 5,000                  | 5,000                  | 0.190         |
| XP_392289IPREDICTED: similar to Calreticulin CG3423-PA isoform 1 [Aphis mellifera]                             | 0.020   | 0.841                   | 14,000 | 29,000               | 26,000               | 55,000            | 5,000                  | 5,000                  | 0.198         |
| NP_001011601major royal jelly protein 3 [Aphis mellifera]                                                      | 0.021   | 0.421                   | 17,000 | 32,000               | 23,000               | 55,000            | 5,000                  | 5,000                  | 0.190         |
| XP_392478IPREDICTED: similar to mitochondrial malate dehydrogenase precursor isoform 1 [Aphis mellifera]       | 0.022   | 0.310                   | 18,000 | 33,000               | 22,000               | 55,000            | 5,000                  | 5,000                  | 0.198         |
| XP_392501IPREDICTED: similar to Muscde protein 20 CG4595-PA isoform A [Aphis mellifera]                        | 0.022   | 0.095                   | 4,000  | 19,000               | 36,000               | 55,000            | 5,000                  | 5,000                  | 0.190         |
| XP_001121019IPREDICTED: similar to HLA-B-associated transactin 3 [Aphis mellifera]                             | 0.023   | 0.222                   | 6,000  | 21,000               | 34,000               | 55,000            | 5,000                  | 5,000                  | 0.198         |
| XP_392618IPREDICTED: similar to actinotic CG3383-PB isoform B [Aphis mellifera]                                | 0.024   | 13,000                  | 29,000 | 27,000               | 55,000               | 5,000             | 5,000                  | 0.190                  |               |
| XP_623199IPREDICTED: similar to Hsp70Cb CG6603-PA isoform 1 [Aphis mellifera]                                  | 0.024   | 0.548                   | 9,000  | 24,000               | 31,000               | 55,000            | 5,000                  | 5,000                  | 0.190         |
| XP_623487IPREDICTED: similar to Actin 87E isoform 2 [Aphis mellifera]                                          | 0.026   | 0.690                   | 10,000 | 25,000               | 30,000               | 55,000            | 5,000                  | 5,000                  | 0.167         |
| XP_623730IPREDICTED: similar to Actin 88F CG5178-PA [Aphis mellifera]                                          | 0.027   | 0.690                   | 10,000 | 25,000               | 30,000               | 55,000            | 5,000                  | 5,000                  | 0.208         |
| XP_623619IPREDICTED: similar to Actin 87E isoform 1 [Aphis mellifera]                                          | 0.027   | 0.690                   | 10,000 | 25,000               | 30,000               | 55,000            | 5,000                  | 5,000                  | 0.190         |
| XP_623826IPREDICTED: similar to Actin 87E isoform 1 [Aphis mellifera]                                          | 0.027   | 0.690                   | 10,000 | 25,000               | 30,000               | 55,000            | 5,000                  | 5,000                  | 0.208         |
| XP_623894IPREDICTED: similar to Actin 87E isoform 2 [Aphis mellifera]                                          | 0.027   | 0.690                   | 10,000 | 25,000               | 30,000               | 55,000            | 5,000                  | 5,000                  | 0.190         |
| XP_624381IPREDICTED: similar to Actin 8C isoform 2 [Aphis mellifera]                                           | 0.029   | 1,000                   | 12,000 | 27,000               | 28,000               | 55,000            | 5,000                  | 5,000                  | 0.190         |
| XP_393368IPREDICTED: similar to Actin 8C isoform 1 [Aphis mellifera]                                           | 0.029   | 1,000                   | 12,000 | 27,000               | 28,000               | 55,000            | 5,000                  | 5,000                  | 0.198         |
| XP_397201IPREDICTED: similar to CG6469-PA [Aphis mellifera]                                                    | 0.031   | 1,000                   | 12,000 | 27,000               | 28,000               | 55,000            | 5,000                  | 5,000                  | 0.198         |
| XP_623282IPREDICTED: similar to ERp60 CG8983-PA isoform A isoform 2 [Aphis mellifera]                          | 0.032   | 0.151                   | 5,000  | 20,000               | 35,000               | 55,000            | 5,000                  | 5,000                  | 0.198         |
| XP_392479IPREDICTED: similar to CG8798-PA isoform A [Aphis mellifera]                                          | 0.033   | 0.421                   | 8,000  | 23,000               | 32,000               | 55,000            | 5,000                  | 5,000                  | 0.198         |
| XP_001122747IPREDICTED: similar to yellow-82 CG37044-PA [Aphis mellifera]                                      | 0.034   | 0.421                   | 8,000  | 23,000               | 32,000               | 55,000            | 5,000                  | 5,000                  | 0.198         |
| XP_623130IPREDICTED: similar to heat shock protein 8 isoform 1 [Aphis mellifera]                               | 0.035   | 0.690                   | 15,000 | 30,000               | 26,000               | 55,000            | 5,000                  | 5,000                  | 0.208         |
| XP_623084IPREDICTED: similar to Aldohde dehydrogenase CG3752-PA isoform 1 [Aphis mellifera]                    | 0.041   | 1,000                   | 12,000 | 27,000               | 28,000               | 55,000            | 5,000                  | 5,000                  | 0.198         |
| XP_394036IPREDICTED: similar to tubulin beta 2 [Aphis mellifera]                                               | 0.042   | 0.841                   | 11,000 | 26,000               | 29,000               | 55,000            | 5,000                  | 5,000                  | 0.198         |
| XP_624158IPREDICTED: similar to ATP synthase CG1154-PA isoform A [Aphis mellifera]                             | 0.043   | 0.548                   | 9,000  | 24,000               | 31,000               | 55,000            | 5,000                  | 5,000                  | 0.198         |
| XP_392933IPREDICTED: similar to heat shock protein 8 isoform 1 [Aphis mellifera]                               | 0.052   | 1,000                   | 12,000 | 27,000               | 28,000               | 55,000            | 5,000                  | 5,000                  | 0.151         |
| XP_626018IPREDICTED: similar to Actin 8C [Aphis mellifera]                                                     | 0.056   | 0.421                   | 17,000 | 32,000               | 23,000               | 55,000            | 5,000                  | 5,000                  | 0.198         |
| XP_001121108IPREDICTED: similar to T0C17.5 - partial [Aphis mellifera]                                         | 0.058   | 0.690                   | 15,000 | 30,000               | 26,000               | 55,000            | 5,000                  | 5,000                  | 0.198         |
| XP_393099IPREDICTED: similar to Heat shock protein cognate 3 CG4147-PA isoform A [Aphis mellifera]             | 0.062   | 14,000                  | 29,000 | 26,000               | 55,000               | 5,000             | 5,000                  | 0.198                  |               |
| XP_625004IPREDICTED: similar to CG15006-PA [Aphis mellifera]                                                   | 0.078   | 0.421                   | 8,000  | 23,000               | 32,000               | 55,000            | 5,000                  | 5,000                  | 0.198         |
| XP_623555IPREDICTED: similar to Nascant polyprotein associated complex protein alpha subunit CG8759-PB         | 0.082   | 0.421                   | 8,000  | 23,000               | 32,000               | 55,000            | 5,000                  | 5,000                  | 0.190         |
| XP_395475IPREDICTED: similar to Protein lethal 2 essential for life (Protein E021) isoform 1 [Aphis mellifera] | 0.085   | 1,000                   | 12,000 | 27,000               | 28,000               | 55,000            | 5,000                  | 5,000                  | 0.190         |
| XP_001122691IPREDICTED: similar to CG3384-PB isoform B [Aphis mellifera]                                       | 0.092   | 0.690                   | 15,000 | 30,000               | 26,000               | 55,000            | 5,000                  | 5,000                  | 0.198         |
| XP_396268IPREDICTED: similar to CG3323-PA [Aphis mellifera]                                                    | 0.111   | 0.548                   | 16,000 | 31,000               | 24,000               | 55,000            | 5,000                  | 5,000                  | 0.198         |
| XP_623048IPREDICTED: similar to Troponomyosin 1 CG4898-PD isoform D [Aphis mellifera]                          | 0.112   | 0.548                   | 16,000 | 31,000               | 24,000               | 55,000            | 5,000                  | 5,000                  | 0.190         |
| XP_001121072IPREDICTED: similar to CG3244-PA [Aphis mellifera]                                                 | 0.126   | 0.690                   | 10,000 | 25,000               | 30,000               | 55,000            | 5,000                  | 5,000                  | 0.214         |
| XP_393336IPREDICTED: similar to Myosin heavy chain CG17927-PB isoform B isoform 1 [Aphis mellifera]            | 0.127   | 1,000                   | 12,000 | 27,000               | 28,000               | 55,000            | 5,000                  | 5,000                  | 0.208         |
| XP_393338IPREDICTED: similar to Myosin heavy chain CG17927-PB isoform B isoform 2 [Aphis mellifera]            | 0.127   | 1,000                   | 12,000 | 27,000               | 28,000               | 55,000            | 5,000                  | 5,000                  | 0.190         |
| NP_0010114993elongation factor 1-alpha [Aphis mellifera]                                                       | 0.138   | 0.690                   | 15,000 | 30,000               | 26,000               | 55,000            | 5,000                  | 5,000                  | 0.198         |
| XP_623232IPREDICTED: similar to zipper CG15792-PD isoform D [Aphis mellifera]                                  | 0.154   | 0.841                   | 14,000 | 29,000               | 26,000               | 55,000            | 5,000                  | 5,000                  | 0.151         |
| XP_394199IPREDICTED: similar to Tubulin alpha-B chain (Alpha-tubulin b)                                        | 0.160   | 0.841                   | 14,000 | 29,000               | 27,000               | 55,000            | 5,000                  | 5,000                  | 0.198         |
| XP_001123088IPREDICTED: similar to tubulin alpha 1 [Aphis mellifera]                                           | 0.160   | 0.841                   | 14,000 | 29,000               | 27,000               | 55,000            | 5,000                  | 5,000                  | 0.198         |
| XP_392126IPREDICTED: similar to Troponomyosin 1 CG4898-PD isoform D isoform 1 [Aphis mellifera]                | 0.169   | 0.690                   | 15,000 | 30,000               | 26,000               | 55,000            | 5,000                  | 5,000                  | 0.175         |
| XP_392406IPREDICTED: similar to CG14207-PB isoform B isoform 1 [Aphis mellifera]                               | 0.174   | 1,000                   | 13,000 | 28,000               | 27,000               | 55,000            | 5,000                  | 5,000                  | 0.198         |
| XP_623938IPREDICTED: similar to heat shock protein 90-alpha isoform 2 [Aphis mellifera]                        | 0.188   | 0.841                   | 14,000 | 29,000               | 26,000               | 55,000            | 5,000                  | 5,000                  | 0.190         |
| XP_624581IPREDICTED: similar to heat shock protein 1 beta isoform 1 [Aphis mellifera]                          | 0.188   | 0.841                   | 14,000 | 29,000               | 26,000               | 55,000            | 5,000                  | 5,000                  | 0.190         |
| XP_624767IPREDICTED: hypothetical protein [Aphis mellifera]                                                    | 0.198   | 0.841                   | 14,000 | 29,000               | 26,000               | 55,000            | 5,000                  | 5,000                  | 0.190         |
| XP_623470IPREDICTED: similar to Troponomyosin 1 CG4898-PB isoform B isoform 2 [Aphis mellifera]                | 0.204   | 0.841                   | 14,000 | 29,000               | 26,000               | 55,000            | 5,000                  | 5,000                  | 0.190         |
| XP_001120222IPREDICTED: hypothetical protein [Aphis mellifera]                                                 | 0.204   | 0.690                   | 15,000 | 30,000               | 26,000               | 55,000            | 5,000                  | 5,000                  | 0.151         |
| XP_001123416IPREDICTED: similar to Tubulin alpha 3 chain (Alpha-tubulin 3) - partial [Aphis mellifera]         | 0.209   | 0.690                   | 15,000 | 30,000               | 26,000               | 55,000            | 5,000                  | 5,000                  | 0.198         |
| NP_001011628translational elongation factor eIF-1 alpha chain [Aphis mellifera]                                | 0.222   | 0.841                   | 14,000 | 29,000               | 26,000               | 55,000            | 5,000                  | 5,000                  | 0.190         |
| XP_393371IPREDICTED: similar to Myosin regulatory light chain 2 (MLC-2) [Aphis mellifera]                      | 0.226   | 0.310                   | 18,000 | 33,000               | 22,000               | 55,000            | 5,000                  | 5,000                  | 0.198         |
| XP_001121168IPREDICTED: similar to CG32405-PA [Aphis mellifera]                                                | 0.235   | 0.095                   | 4,000  | 19,000               | 36,000               | 55,000            | 5,000                  | 5,000                  | 0.190         |
| XP_392929IPREDICTED: similar to kinesin 1 [Aphis mellifera]                                                    | 0.261   | 0.310                   | 18,000 | 33,000               | 22,000               | 55,000            | 5,000                  | 5,000                  | 0.208         |
| NP_001011600hexamerin 70b [Aphis mellifera]                                                                    | 0.289   | 0.421                   | 17,000 | 32,000               | 23,000               | 55,000            | 5,000                  | 5,000                  | 0.198         |
| XP_624361IPREDICTED: similar to Peroxisome 2540 CG11765-PA [Aphis mellifera]                                   | 0.300   | 0.841                   | 14,000 | 29,000               | 26,000               | 55,000            | 5,000                  | 5,000                  | 0.198         |
| XP_395571IPREDICTED: similar to Dodeca-satellite-binding protein 1 CG5170-FC isoform C [Aphis mellifera]       | 0.304   | 1,000                   | 12,000 | 27,000               | 28,000               | 55,000            | 5,000                  | 5,000                  | 0.208         |
| XP_39514IPREDICTED: similar to Cytochrome b3 CG5520-PA isoform 1 [Aphis mellifera]                             | 0.323   | 0.841                   | 11,000 | 26,000               | 29,000               | 55,000            | 5,000                  | 5,000                  | 0.159         |
| XP_392313IPREDICTED: similar to Tubulin at 560 CG3277-PB isoform B [Aphis mellifera]                           | 0.354   | 0.421                   | 8,000  | 23,000               | 32,000               | 55,000            | 5,000                  | 5,000                  | 0.190         |
| NP_001014429major royal jelly protein 7 [Aphis mellifera]                                                      | 0.359   | 0.690                   | 15,000 | 30,000               | 26,000               | 55,000            | 5,000                  | 5,000                  | 0.198         |
| XP_391361IPREDICTED: similar to Troponomyosin 2 CG4843-PB isoform B [Aphis mellifera]                          | 0.374   | 1,000                   | 13,000 | 28,000               | 27,000               | 55,000            | 5,000                  | 5,000                  | 0.198         |
| XP_623336IPREDICTED: similar to Troponomyosin 1 CG4898-PD isoform 1 [Aphis mellifera]                          | 0.415   | 0.421                   | 17,000 | 32,000               | 23,000               | 55,000            | 5,000                  | 5,000                  | 0.198         |
| XP_001122917IPREDICTED: hypothetical protein [Aphis mellifera]                                                 | 0.450   | 0.690                   | 15,000 | 30,000               | 26,000               | 55,000            | 5,000                  | 5,000                  | 0.208         |
| XP_392147IPREDICTED: similar to Heat shock protein cognate 5 CG8542-PA [Aphis mellifera]                       | 0.464   | 0.222                   | 19,000 | 34,000               | 21,000               | 55,000            | 5,000                  | 5,000                  | 0.190         |
| XP_623298IPREDICTED: similar to Troponomyosin 1 CG4898-PA isoform A [Aphis mellifera]                          | 0.519   | 0.548                   | 16,000 | 31,000               | 24,000               | 55,000            | 5,000                  | 5,000                  | 0.198         |
| NP_001035313invariant histone protein 14 [Aphis mellifera]                                                     | 0.527   | 1,000                   | 13,000 | 28,000               | 27,000               | 55,000            | 5,000                  | 5,000                  | 0.190         |
| XP_001123471IPREDICTED: similar to 3-hydroxyacyl-CoA dehydrogenase hspc-2                                      | 0.538   | 0.548                   | 9,000  | 24,000               | 31,000               | 55,000            | 5,000                  | 5,000                  | 0.190         |
| XP_623083IPREDICTED: similar to ATP citrate lyase CG8322-PA isoform A isoform 1 [Aphis mellifera]              | 0.559   | 0.421                   | 17,000 | 32,000               | 23,000               | 55,000            | 5,000                  | 5,000                  | 0.214         |
| XP_623156IPREDICTED: similar to ATP citrate lyase CG8322-PA isoform A isoform 2 [Aphis mellifera]              | 0.559   | 0.421                   | 17,000 | 32,000               | 23,000               | 55,000            | 5,000                  | 5,000                  | 0.208         |
| XP_624781IPREDICTED: similar to 60S acidic ribosomal protein P1 (RP21C)                                        | 0.568   | 0.690                   | 15,000 | 30,000               | 26,000               | 55,000            | 5,000                  | 5,000                  | 0.190         |
| XP_392319IPREDICTED: similar to Superoxide dismutase CG11783-PA isoform 1 [Aphis mellifera]                    | 0.603   | 1,000                   | 13,000 | 28,000               | 27,000               | 55,000            | 5,000                  | 5,000                  | 0.190         |
| XP_394466IPREDICTED: similar to Tubulin at 600 CG3401-PA [Aphis mellifera]                                     | 0.608   | 0.548                   | 16,000 | 31,000               | 24,000               | 55,000            | 5,000                  | 5,000                  | 0.198         |
| XP_396338IPREDICTED: similar to Tubulin alpha-1 chain [Aphis mellifera]                                        | 0.658   | 0.690                   | 15,000 | 30,000               | 2                    |                   |                        |                        |               |



| Protein description                                                                                             | KWvalue | (IRS-TOR)<br>I/Control | U      | sample 1<br>Rank sum | sample 2<br>Rank sum | Total<br>Rank sum | sample 1<br>Replicates | sample 2<br>Replicates | pvalue cutoff |
|-----------------------------------------------------------------------------------------------------------------|---------|------------------------|--------|----------------------|----------------------|-------------------|------------------------|------------------------|---------------|
| XP_023154IPREDICTED: similar to CG6180-PA isoform 3 [Apis mellifera]                                            | 0.002   | 0.008                  | 25,000 | 40,000               | 15,000               | 55,000            | 5,000                  | 5,000                  | 0.206         |
| XP_392060IPREDICTED: similar to CG6180-PA isoform 1 [Apis mellifera]                                            | 0.002   | 0.008                  | 25,000 | 40,000               | 15,000               | 55,000            | 5,000                  | 5,000                  | 0.167         |
| XP_001123007IPREDICTED: similar to CG6180-PA isoform 1 [Apis mellifera]                                         | 0.003   | 0.008                  | 25,000 | 40,000               | 15,000               | 55,000            | 5,000                  | 5,000                  | 0.206         |
| XP_624910IPREDICTED: similar to CG11267-PA [Apis mellifera]                                                     | 0.005   | 0.008                  | 40,000 | 15,000               | 55,000               | 5,000             | 5,000                  | 0.206                  |               |
| XP_00112314IPREDICTED: similar to CG33205-PA [Apis mellifera]                                                   | 0.008   | 0.008                  | 25,000 | 40,000               | 15,000               | 55,000            | 5,000                  | 0.198                  |               |
| XP_624628IPREDICTED: similar to CG6206-PB isoform B [Apis mellifera]                                            | 0.008   | 0.008                  | 25,000 | 40,000               | 15,000               | 55,000            | 5,000                  | 0.198                  |               |
| XP_393445IPREDICTED: similar to thioredoxin peroxidase 1 CG1633-PA isoform A isoform 1 [Apis mellifera]         | 0.011   | 0.008                  | 25,000 | 40,000               | 15,000               | 55,000            | 5,000                  | 0.190                  |               |
| XP_001120181IPREDICTED: similar to CG31618-PA [Apis mellifera]                                                  | 0.012   | 0.018                  | 24,000 | 39,000               | 15,000               | 55,000            | 5,000                  | 0.190                  |               |
| XP_00112314IPREDICTED: similar to CG31608-PA [Apis mellifera]                                                   | 0.013   | 0.008                  | 25,000 | 40,000               | 15,000               | 55,000            | 5,000                  | 0.206                  |               |
| XP_624700IPREDICTED: similar to CG31618-PA [Apis mellifera]                                                     | 0.013   | 0.016                  | 24,000 | 39,000               | 16,000               | 55,000            | 5,000                  | 0.198                  |               |
| XP_001120934IPREDICTED: similar to CG31618-PA [Apis mellifera]                                                  | 0.013   | 0.016                  | 24,000 | 39,000               | 16,000               | 55,000            | 5,000                  | 0.198                  |               |
| XP_001120346IPREDICTED: similar to CG31618-PA [Apis mellifera]                                                  | 0.013   | 0.016                  | 24,000 | 39,000               | 16,000               | 55,000            | 5,000                  | 0.198                  |               |
| XP_001119899IPREDICTED: similar to CG31618-PA [Apis mellifera]                                                  | 0.013   | 0.016                  | 24,000 | 39,000               | 16,000               | 55,000            | 5,000                  | 0.176                  |               |
| XP_395047IPREDICTED: similar to Phosphoserine kinase isoform 1 [Apis mellifera]                                 | 0.014   | 0.008                  | 25,000 | 40,000               | 15,000               | 55,000            | 5,000                  | 0.190                  |               |
| XP_001120262IPREDICTED: similar to Actin 88F CG5178-PA [Apis mellifera]                                         | 0.014   | 0.032                  | 2,000  | 17,000               | 38,000               | 55,000            | 5,000                  | 0.190                  |               |
| XP_624041IPREDICTED: similar to Laval serum protein 2 CG5806-PA [Apis mellifera]                                | 0.014   | 0.038                  | 0,000  | 15,000               | 40,000               | 55,000            | 5,000                  | 0.198                  |               |
| XP_392481IPREDICTED: similar to CG6342-PA [Apis mellifera]                                                      | 0.018   | 0.008                  | 25,000 | 40,000               | 15,000               | 55,000            | 5,000                  | 0.198                  |               |
| XP_624806IPREDICTED: similar to CG7217-PB isoform B [Apis mellifera]                                            | 0.016   | 0.016                  | 24,000 | 39,000               | 16,000               | 55,000            | 5,000                  | 0.198                  |               |
| XP_623432IPREDICTED: similar to Aldolase CG6058-PF isoform F [Apis mellifera]                                   | 0.017   | 0.008                  | 0,000  | 15,000               | 40,000               | 55,000            | 5,000                  | 0.198                  |               |
| NP_001011580major royal jelly protein 2 [Apis mellifera]                                                        | 0.018   | 0.038                  | 0,000  | 15,000               | 40,000               | 55,000            | 5,000                  | 0.190                  |               |
| XP_392389IPREDICTED: similar to Calretinin CG3423-PA isoform 1 [Apis mellifera]                                 | 0.020   | 0.008                  | 0,000  | 15,000               | 40,000               | 55,000            | 5,000                  | 0.198                  |               |
| NP_001011601major royal jelly protein 3 [Apis mellifera]                                                        | 0.021   | 0.008                  | 0,000  | 15,000               | 40,000               | 55,000            | 5,000                  | 0.198                  |               |
| XP_392478IPREDICTED: similar to mitochondrial malate dehydrogenase precursor isoform 1 [Apis mellifera]         | 0.022   | 0.032                  | 23,000 | 38,000               | 17,000               | 55,000            | 5,000                  | 0.190                  |               |
| XP_392450IPREDICTED: similar to Muscle protein 20 CG4595-PA isoform A [Apis mellifera]                          | 0.022   | 0.018                  | 24,000 | 39,000               | 16,000               | 55,000            | 5,000                  | 0.190                  |               |
| XP_001121619IPREDICTED: similar to HLA-B-associated transactin 3 [Apis mellifera]                               | 0.023   | 0.008                  | 25,000 | 40,000               | 15,000               | 55,000            | 5,000                  | 0.198                  |               |
| XP_392618IPREDICTED: similar to Isotonic CG3383-PB isoform B [Apis mellifera]                                   | 0.016   | 0.016                  | 24,000 | 39,000               | 16,000               | 55,000            | 5,000                  | 0.206                  |               |
| XP_623199IPREDICTED: similar to Hsp70Cb CG6603-PA isoform 1 [Apis mellifera]                                    | 0.024   | 0.016                  | 24,000 | 39,000               | 16,000               | 55,000            | 5,000                  | 0.198                  |               |
| XP_623487IPREDICTED: similar to Actin 87E isoform 2 [Apis mellifera]                                            | 0.026   | 0.008                  | 0,000  | 15,000               | 40,000               | 55,000            | 5,000                  | 0.206                  |               |
| XP_623730IPREDICTED: similar to Actin 88F CG5178-PA [Apis mellifera]                                            | 0.027   | 0.008                  | 0,000  | 15,000               | 40,000               | 55,000            | 5,000                  | 0.214                  |               |
| XP_623619IPREDICTED: similar to Actin 87E isoform 1 [Apis mellifera]                                            | 0.027   | 0.008                  | 0,000  | 15,000               | 40,000               | 55,000            | 5,000                  | 0.190                  |               |
| XP_623826IPREDICTED: similar to Actin 87E isoform 1 [Apis mellifera]                                            | 0.027   | 0.008                  | 0,000  | 15,000               | 40,000               | 55,000            | 5,000                  | 0.190                  |               |
| XP_623694IPREDICTED: similar to Actin 87E isoform 2 [Apis mellifera]                                            | 0.027   | 0.008                  | 0,000  | 15,000               | 40,000               | 55,000            | 5,000                  | 0.206                  |               |
| XP_623438IPREDICTED: similar to Actin 87E isoform 2 [Apis mellifera]                                            | 0.029   | 0.008                  | 0,000  | 15,000               | 40,000               | 55,000            | 5,000                  | 0.190                  |               |
| XP_393368IPREDICTED: similar to Actin 87E isoform 1 [Apis mellifera]                                            | 0.029   | 0.008                  | 0,000  | 15,000               | 40,000               | 55,000            | 5,000                  | 0.167                  |               |
| XP_397201IPREDICTED: similar to CG6459-PA [Apis mellifera]                                                      | 0.031   | 0.008                  | 25,000 | 40,000               | 15,000               | 55,000            | 5,000                  | 0.198                  |               |
| XP_623282IPREDICTED: similar to ERp60 CG8983-PA isoform A isoform 2 [Apis mellifera]                            | 0.032   | 0.095                  | 21,000 | 36,000               | 19,000               | 55,000            | 5,000                  | 0.198                  |               |
| XP_392478IPREDICTED: similar to CG8798-PA isoform A [Apis mellifera]                                            | 0.033   | 0.018                  | 24,000 | 39,000               | 16,000               | 55,000            | 5,000                  | 0.198                  |               |
| XP_001122747IPREDICTED: similar to yellow-2 CG37044-PA [Apis mellifera]                                         | 0.034   | 0.008                  | 25,000 | 40,000               | 15,000               | 55,000            | 5,000                  | 0.198                  |               |
| XP_623130IPREDICTED: similar to heat shock protein 8 isoform 1 [Apis mellifera]                                 | 0.035   | 0.016                  | 24,000 | 39,000               | 16,000               | 55,000            | 5,000                  | 0.206                  |               |
| XP_623084IPREDICTED: similar to Aldohydroxy dehydrogenase CG3752-PA isoform 1 [Apis mellifera]                  | 0.041   | 0.016                  | 1,000  | 16,000               | 39,000               | 55,000            | 5,000                  | 0.206                  |               |
| XP_394033IPREDICTED: similar to tubulin beta 2 [Apis mellifera]                                                 | 0.044   | 0.016                  | 24,000 | 39,000               | 16,000               | 55,000            | 5,000                  | 0.198                  |               |
| XP_624158IPREDICTED: similar to ATP synthase CG1154-PA isoform A [Apis mellifera]                               | 0.051   | 0.110                  | 19,000 | 23,000               | 42,000               | 55,000            | 5,000                  | 0.198                  |               |
| XP_392933IPREDICTED: similar to heat shock protein 8 isoform 1 [Apis mellifera]                                 | 0.052   | 0.016                  | 24,000 | 39,000               | 16,000               | 55,000            | 5,000                  | 0.190                  |               |
| XP_625018IPREDICTED: similar to Actin 87E isoform 1 [Apis mellifera]                                            | 0.056   | 0.008                  | 3,000  | 18,000               | 37,000               | 55,000            | 5,000                  | 0.151                  |               |
| XP_001121408IPREDICTED: similar to T0C17.5 - partial [Apis mellifera]                                           | 0.058   | 0.032                  | 2,000  | 17,000               | 37,000               | 55,000            | 5,000                  | 0.206                  |               |
| XP_393099IPREDICTED: similar to Heat shock protein cognate 3 CG4147-PA isoform A [Apis mellifera]               | 0.062   | 0.233                  | 6,000  | 17,000               | 43,000               | 55,000            | 5,000                  | 0.198                  |               |
| XP_625004IPREDICTED: similar to CG15006-PA [Apis mellifera]                                                     | 0.078   | 0.056                  | 22,000 | 37,000               | 18,000               | 55,000            | 5,000                  | 0.198                  |               |
| XP_623555IPREDICTED: similar to Nascient polypeptide associated complex protein alpha subunit CG8759-PB         | 0.082   | 0.008                  | 0,000  | 15,000               | 40,000               | 55,000            | 5,000                  | 0.206                  |               |
| XP_395475IPREDICTED: similar to Protein lethal 2 essential for life (Protein E021) isoform 1 [Apis mellifera]   | 0.085   | 0.008                  | 0,000  | 15,000               | 40,000               | 55,000            | 5,000                  | 0.206                  |               |
| XP_001122691IPREDICTED: similar to CG3384-PB isoform B [Apis mellifera]                                         | 0.092   | 0.016                  | 24,000 | 39,000               | 16,000               | 55,000            | 5,000                  | 0.198                  |               |
| XP_396268IPREDICTED: similar to CG3523-PA [Apis mellifera]                                                      | 0.111   | 0.032                  | 17,000 | 38,000               | 17,000               | 55,000            | 5,000                  | 0.198                  |               |
| XP_623048IPREDICTED: similar to Troponin-51 CG4898-PD isoform D [Apis mellifera]                                | 0.112   | 0.056                  | 3,000  | 18,000               | 37,000               | 55,000            | 5,000                  | 0.206                  |               |
| XP_001121072IPREDICTED: similar to CG3244-PA [Apis mellifera]                                                   | 0.126   | 0.222                  | 10,000 | 34,000               | 21,000               | 55,000            | 5,000                  | 0.214                  |               |
| XP_393349IPREDICTED: similar to Myosin heavy chain CG17927-PB isoform B isoform 1 [Apis mellifera]              | 0.127   | 0.008                  | 22,000 | 37,000               | 18,000               | 55,000            | 5,000                  | 0.198                  |               |
| XP_393348IPREDICTED: similar to Myosin heavy chain CG17927-PB isoform B isoform 2 [Apis mellifera]              | 0.127   | 0.008                  | 22,000 | 37,000               | 18,000               | 55,000            | 5,000                  | 0.198                  |               |
| NP_001014993elongation factor 1-alpha [Apis mellifera]                                                          | 0.138   | 0.222                  | 19,000 | 34,000               | 21,000               | 55,000            | 5,000                  | 0.190                  |               |
| XP_623232IPREDICTED: similar to zipper CG15792-PD isoform D [Apis mellifera]                                    | 0.154   | 0.095                  | 21,000 | 36,000               | 19,000               | 55,000            | 5,000                  | 0.214                  |               |
| XP_394199IPREDICTED: similar to Tubulin alpha-B chain (Alpha-tubulin b)                                         | 0.164   | 0.310                  | 18,000 | 33,000               | 22,000               | 55,000            | 5,000                  | 0.206                  |               |
| XP_001123088IPREDICTED: similar to tubulin alpha 1 [Apis mellifera]                                             | 0.172   | 0.008                  | 25,000 | 40,000               | 15,000               | 55,000            | 5,000                  | 0.198                  |               |
| XP_392126IPREDICTED: similar to Troponin-51 CG4898-PD isoform D isoform 1 [Apis mellifera]                      | 0.169   | 0.095                  | 4,000  | 19,000               | 36,000               | 55,000            | 5,000                  | 0.206                  |               |
| XP_392405IPREDICTED: similar to CG14207-PB isoform B isoform 1 [Apis mellifera]                                 | 0.174   | 0.056                  | 22,000 | 37,000               | 18,000               | 55,000            | 5,000                  | 0.190                  |               |
| XP_623938IPREDICTED: similar to heat shock protein 90-alpha isoform 2 [Apis mellifera]                          | 0.198   | 0.841                  | 14,000 | 29,000               | 26,000               | 55,000            | 5,000                  | 0.167                  |               |
| XP_624581IPREDICTED: similar to heat shock protein 1 beta isoform 1 [Apis mellifera]                            | 0.198   | 0.841                  | 14,000 | 29,000               | 26,000               | 55,000            | 5,000                  | 0.167                  |               |
| XP_624767IPREDICTED: hypothetical protein [Apis mellifera]                                                      | 0.198   | 0.056                  | 1,000  | 19,000               | 37,000               | 55,000            | 5,000                  | 0.206                  |               |
| XP_623470IPREDICTED: similar to Troponin-51 CG4898-PB isoform B isoform 2 [Apis mellifera]                      | 0.204   | 0.095                  | 4,000  | 19,000               | 36,000               | 55,000            | 5,000                  | 0.190                  |               |
| XP_001120222IPREDICTED: hypothetical protein [Apis mellifera]                                                   | 0.204   | 0.421                  | 8,000  | 23,000               | 32,000               | 55,000            | 5,000                  | 0.206                  |               |
| XP_001123434IPREDICTED: similar to Tubulin alpha-3 chain (Alpha-tubulin 3) - partial [Apis mellifera]           | 0.209   | 0.222                  | 19,000 | 34,000               | 22,000               | 55,000            | 5,000                  | 0.198                  |               |
| NP_001011628translational elongation factor eEF-1 alpha chain [Apis mellifera]                                  | 0.222   | 0.841                  | 11,000 | 26,000               | 29,000               | 55,000            | 5,000                  | 0.198                  |               |
| XP_393371IPREDICTED: similar to Myosin regulatory light chain 2 (MLC-2) [Apis mellifera]                        | 0.226   | 0.310                  | 18,000 | 33,000               | 22,000               | 55,000            | 5,000                  | 0.198                  |               |
| XP_001121468IPREDICTED: similar to CG32405-PA [Apis mellifera]                                                  | 0.235   | 0.222                  | 8,000  | 21,000               | 34,000               | 55,000            | 5,000                  | 0.206                  |               |
| XP_392929IPREDICTED: similar to kinesin 1 [Apis mellifera]                                                      | 0.261   | 0.841                  | 14,000 | 29,000               | 26,000               | 55,000            | 5,000                  | 0.198                  |               |
| NP_001011600hexamerin 70b [Apis mellifera]                                                                      | 0.269   | 0.548                  | 16,000 | 31,000               | 24,000               | 55,000            | 5,000                  | 0.190                  |               |
| XP_624361IPREDICTED: similar to Peroxisome 2540 CG11765-PA [Apis mellifera]                                     | 0.300   | 0.841                  | 14,000 | 29,000               | 26,000               | 55,000            | 5,000                  | 0.190                  |               |
| XP_395579IPREDICTED: similar to Dodeca-satellite-binding protein 1 CG5170-FC isoform C [Apis mellifera]         | 0.304   | 0.151                  | 20,000 | 35,000               | 20,000               | 55,000            | 5,000                  | 0.198                  |               |
| XP_395149IPREDICTED: similar to Cytochrome b3 CG5520-PA isoform 1 [Apis mellifera]                              | 0.323   | 0.222                  | 6,000  | 21,000               | 34,000               | 55,000            | 5,000                  | 0.206                  |               |
| XP_392313IPREDICTED: similar to Tubulin at 560 CG3277-PB isoform B [Apis mellifera]                             | 0.354   | 0.151                  | 20,000 | 35,000               | 20,000               | 55,000            | 5,000                  | 0.198                  |               |
| NP_001014429major royal jelly protein 7 [Apis mellifera]                                                        | 0.359   | 0.151                  | 5,000  | 20,000               | 35,000               | 55,000            | 5,000                  | 0.190                  |               |
| XP_391361IPREDICTED: similar to Troponin-52 CG4843-PB isoform B [Apis mellifera]                                | 0.374   | 0.690                  | 10,000 | 25,000               | 30,000               | 55,000            | 5,000                  | 0.190                  |               |
| XP_623339IPREDICTED: similar to Troponin-51 CG4898-PD isoform D isoform 1 [Apis mellifera]                      | 0.415   | 0.222                  | 6,000  | 21,000               | 34,000               | 55,000            | 5,000                  | 0.198                  |               |
| XP_001122917IPREDICTED: hypothetical protein [Apis mellifera]                                                   | 0.690   | 0.690                  | 15,000 | 30,000               | 25,000               | 55,000            | 5,000                  | 0.198                  |               |
| XP_392147IPREDICTED: similar to Heat shock protein cognate 5 CG8542-PA [Apis mellifera]                         | 0.464   | 0.310                  | 7,000  | 22,000               | 33,000               | 55,000            | 5,000                  | 0.190                  |               |
| XP_623298IPREDICTED: similar to Troponin-51 CG4898-PA isoform A [Apis mellifera]                                | 0.519   | 0.548                  | 9,000  | 24,000               | 31,000               | 55,000            | 5,000                  | 0.190                  |               |
| NP_001035313invariant histone protein 14 [Apis mellifera]                                                       | 0.527   | 0.151                  | 5,000  | 20,000               | 35,000               | 55,000            | 5,000                  | 0.190                  |               |
| XP_001120471IPREDICTED: similar to 3-hydroxyacyl-CoA dehydrogenase hsd-2                                        | 0.538   | 0.421                  | 17,000 | 32,000               | 23,000               | 55,000            | 5,000                  | 0.151                  |               |
| XP_623083IPREDICTED: similar to ATP citrate lyase CG8322-PA isoform A isoform 1 [Apis mellifera]                | 0.559   | 0.841                  | 11,000 | 26,000               | 29,000               | 55,000            | 5,000                  | 0.206                  |               |
| XP_623156IPREDICTED: similar to ATP citrate lyase CG8322-PA isoform A isoform 2 [Apis mellifera]                | 0.559   | 0.841                  | 11,000 | 26,000               | 29,000               | 55,000            | 5,000                  | 0.198                  |               |
| XP_624781IPREDICTED: similar to 60S acidic ribosomal protein P1 (RP21C)                                         | 0.568   | 0.418                  | 16,000 | 31,000               | 24,000               | 55,000            | 5,000                  | 0.198                  |               |
| XP_392313IPREDICTED: similar to Superoxide dismutase CG11783-PA isoform 1 [Apis mellifera]                      | 0.603   | 0.841                  | 11,000 | 26,000               | 29,000               | 55,000            | 5,000                  | 0.206                  |               |
| XP_394466IPREDICTED: similar to Tubulin at 600 CG3401-PA [Apis mellifera]                                       | 0.608   | 0.548                  | 16,000 | 31,000               | 24,000               | 55,000            | 5,000                  | 0.151                  |               |
| XP_396338IPREDICTED: similar to Tubulin alpha-1 chain [Apis mellifera]                                          | 0.658   | 1.000                  | 13,000 | 27,000               | 24,000               | 55,000            | 5,000                  | 0.190                  |               |
| NP_001011603arippine kinase [Apis mellifera]                                                                    | 0.668   | 1.000                  | 12,000 | 27,000               | 24,000               | 55,000            | 5,000                  | 0.190                  |               |
| XP_624246IPREDICTED: similar to Tubulin alpha-1 chain [Apis mellifera]                                          | 0.674   | 0.548                  | 9,000  | 24,000               | 31,000               | 55,000            | 5,000                  | 0.206                  |               |
| XP_391936IPREDICTED: similar to Tubulin alpha-1 chain [Apis mellifera]                                          | 0.674   | 0.548                  | 9,000  | 24,000               | 31,000               | 55,000            | 5,000                  | 0.190                  |               |
| XP_395299IPREDICTED: similar to Transcriptionally controlled tumor protein CG4800-PA isoform 1 [Apis mellifera] | 0.690   | 0.690                  | 10,000 | 25,000               | 30,000               | 55,000            | 5,000                  | 0.198                  |               |
| XP_395426IPREDICTED: similar to CG17374-PA 3 isoform 1 [Apis mellifera]                                         | 0.722   | 0.548                  | 16,000 | 31,000               | 24,000               | 55,000            | 5,000                  | 0.198                  |               |
| XP_394436IPREDICTED: similar to Ornithine aminotransferase precursor CG8782-PA [Apis mellifera]                 | 0.743   | 0.690                  | 10,000 | 25,000               | 30,000               | 55,000            | 5,000                  | 0.198                  |               |
| XP_624240IPREDICTED: similar to yellow-G CG1628-PA, partial [Apis mellifera]                                    | 0.822   | 0.841                  | 11,000 | 26,000               | 29,000               | 55,000            | 5,000                  | 0.190                  |               |
| XP_625060IPREDICTED: similar to lethal (1) G0230 CG2958-PA [Apis mellifera                                      |         |                        |        |                      |                      |                   |                        |                        |               |

| Protein description                                                                                         | irs   | irs_1 | irs_2 | irs_3 | irs_4 | tor   | tor_1 | tor_2 | tor_3 | tor_4 | double | double_2 | double_3 | double_4 | rfp   | rfp_2 | rfp_3 | rfp_4 |
|-------------------------------------------------------------------------------------------------------------|-------|-------|-------|-------|-------|-------|-------|-------|-------|-------|--------|----------|----------|----------|-------|-------|-------|-------|
| XP_021194PREDEDICTED: similar to CG6180-PA isoform 2 [Apis mellifera]                                       | 0.001 | 0.003 | 0.005 | 0.008 | 0.008 | 0.004 | 0.003 | 0.002 | 0.001 | 0.001 | 0.001  | 0.001    | 0.001    | 0.001    | 0.001 | 0.001 | 0.001 | 0.001 |
| XP_392060PREDEDICTED: similar to CG6180-PA isoform 1 [Apis mellifera]                                       | 0.001 | 0.003 | 0.005 | 0.008 | 0.008 | 0.004 | 0.003 | 0.002 | 0.001 | 0.001 | 0.001  | 0.001    | 0.001    | 0.001    | 0.001 | 0.001 | 0.001 | 0.001 |
| XP_001122907PREDEDICTED: similar to Coo84Ad_CG2341-PA [Apis mellifera]                                      | 0.031 | 0.019 | 0.029 | 0.018 | 0.028 | 0.028 | 0.038 | 0.040 | 0.022 | 0.040 | 0.021  | 0.055    | 0.047    | 0.040    | 0.081 | 0.098 | 0.013 | 0.067 |
| XP_624310PREDEDICTED: similar to CG11267-PA [Apis mellifera]                                                | 0.011 | 0.007 | 0.013 | 0.008 | 0.010 | 0.013 | 0.008 | 0.010 | 0.011 | 0.018 | 0.020  | 0.012    | 0.014    | 0.018    | 0.018 | 0.008 | 0.006 | 0.004 |
| XP_001122907PREDEDICTED: similar to CG32405-PA [Apis mellifera]                                             | 0.018 | 0.009 | 0.014 | 0.010 | 0.012 | 0.013 | 0.011 | 0.008 | 0.011 | 0.018 | 0.017  | 0.008    | 0.007    | 0.001    | 0.010 | 0.008 | 0.054 | 0.027 |
| XP_001122907PREDEDICTED: similar to CG6205-PB isoform B [Apis mellifera]                                    | 0.001 | 0.001 | 0.001 | 0.001 | 0.001 | 0.001 | 0.001 | 0.001 | 0.001 | 0.001 | 0.001  | 0.001    | 0.001    | 0.001    | 0.001 | 0.001 | 0.001 | 0.001 |
| XP_393445PREDEDICTED: similar to thioesterase 1 CG1633-PA isoform A isoform 1 [Apis mellifera]              | 0.001 | 0.000 | 0.003 | 0.005 | 0.001 | 0.001 | 0.002 | 0.003 | 0.000 | 0.001 | 0.004  | 0.003    | 0.001    | 0.003    | 0.002 | 0.000 | 0.000 | 0.000 |
| XP_001120186PREDEDICTED: similar to CG31618-PA [Apis mellifera]                                             | 0.003 | 0.002 | 0.007 | 0.004 | 0.004 | 0.002 | 0.003 | 0.003 | 0.001 | 0.002 | 0.003  | 0.003    | 0.003    | 0.001    | 0.001 | 0.002 | 0.000 | 0.001 |
| XP_001122907PREDEDICTED: similar to CG31618-PA [Apis mellifera]                                             | 0.001 | 0.001 | 0.004 | 0.004 | 0.001 | 0.001 | 0.003 | 0.003 | 0.001 | 0.001 | 0.001  | 0.001    | 0.001    | 0.001    | 0.001 | 0.001 | 0.001 | 0.001 |
| XP_001122907PREDEDICTED: similar to CG31618-PA [Apis mellifera]                                             | 0.003 | 0.002 | 0.007 | 0.004 | 0.004 | 0.002 | 0.003 | 0.003 | 0.001 | 0.002 | 0.003  | 0.003    | 0.003    | 0.001    | 0.001 | 0.002 | 0.000 | 0.001 |
| XP_001120348PREDEDICTED: similar to CG31618-PA [Apis mellifera]                                             | 0.003 | 0.002 | 0.007 | 0.004 | 0.004 | 0.002 | 0.003 | 0.003 | 0.002 | 0.002 | 0.003  | 0.003    | 0.003    | 0.001    | 0.001 | 0.002 | 0.000 | 0.001 |
| XP_001119899PREDEDICTED: similar to CG31618-PA [Apis mellifera]                                             | 0.003 | 0.002 | 0.007 | 0.004 | 0.004 | 0.002 | 0.003 | 0.003 | 0.002 | 0.002 | 0.003  | 0.003    | 0.003    | 0.001    | 0.001 | 0.002 | 0.000 | 0.001 |
| XP_393445PREDEDICTED: similar to Phosphocholine kinase isoform 1 [Apis mellifera]                           | 0.001 | 0.001 | 0.001 | 0.001 | 0.001 | 0.001 | 0.001 | 0.001 | 0.001 | 0.001 | 0.001  | 0.001    | 0.001    | 0.001    | 0.001 | 0.001 | 0.001 | 0.001 |
| XP_001120262PREDEDICTED: similar to Actin 88F CG5178-PA [Apis mellifera]                                    | 0.001 | 0.005 | 0.001 | 0.002 | 0.001 | 0.001 | 0.002 | 0.001 | 0.001 | 0.001 | 0.001  | 0.001    | 0.001    | 0.001    | 0.001 | 0.001 | 0.001 | 0.001 |
| XP_001120419PREDEDICTED: similar to Larval serum protein 2 CG6806-PA [Apis mellifera]                       | 0.004 | 0.016 | 0.002 | 0.003 | 0.006 | 0.008 | 0.004 | 0.002 | 0.001 | 0.008 | 0.011  | 0.001    | 0.009    | 0.003    | 0.003 | 0.023 | 0.012 | 0.031 |
| XP_392481PREDEDICTED: similar to Coo84An_CG2342-PA [Apis mellifera]                                         | 0.038 | 0.018 | 0.048 | 0.003 | 0.048 | 0.028 | 0.047 | 0.088 | 0.017 | 0.022 | 0.020  | 0.050    | 0.027    | 0.028    | 0.092 | 0.011 | 0.008 | 0.011 |
| XP_624310PREDEDICTED: similar to CG2717-PA [Apis mellifera]                                                 | 0.001 | 0.002 | 0.002 | 0.001 | 0.002 | 0.001 | 0.002 | 0.002 | 0.001 | 0.002 | 0.001  | 0.001    | 0.001    | 0.001    | 0.001 | 0.001 | 0.001 | 0.001 |
| XP_623432PREDEDICTED: similar to Aldolase CG5058-PF isoform F [Apis mellifera]                              | 0.003 | 0.008 | 0.003 | 0.000 | 0.001 | 0.002 | 0.000 | 0.002 | 0.000 | 0.000 | 0.000  | 0.003    | 0.001    | 0.002    | 0.000 | 0.012 | 0.011 | 0.005 |
| NP_001011580major royal jelly protein 2 [Apis mellifera]                                                    | 0.012 | 0.002 | 0.004 | 0.012 | 0.013 | 0.023 | 0.012 | 0.001 | 0.002 | 0.003 | 0.018  | 0.016    | 0.013    | 0.001    | 0.051 | 0.020 | 0.045 | 0.047 |
| XP_392481PREDEDICTED: similar to Calreticulin CG2429-PA [Apis mellifera]                                    | 0.001 | 0.003 | 0.001 | 0.001 | 0.001 | 0.001 | 0.001 | 0.001 | 0.001 | 0.001 | 0.001  | 0.001    | 0.001    | 0.001    | 0.001 | 0.001 | 0.001 | 0.001 |
| NP_001011580minor royal jelly protein 3 [Apis mellifera]                                                    | 0.014 | 0.004 | 0.004 | 0.025 | 0.033 | 0.028 | 0.018 | 0.045 | 0.011 | 0.020 | 0.031  | 0.024    | 0.001    | 0.001    | 0.001 | 0.001 | 0.001 | 0.001 |
| XP_392478PREDEDICTED: similar to mitochondrial dehydrogenase precursor isoform 1 [Apis mellifera]           | 0.002 | 0.004 | 0.003 | 0.007 | 0.004 | 0.004 | 0.006 | 0.009 | 0.007 | 0.005 | 0.006  | 0.005    | 0.004    | 0.007    | 0.002 | 0.001 | 0.000 | 0.003 |
| XP_392501PREDEDICTED: similar to Muscle protein 20 CG4696-PA isoform A [Apis mellifera]                     | 0.001 | 0.001 | 0.004 | 0.004 | 0.003 | 0.001 | 0.001 | 0.002 | 0.000 | 0.001 | 0.000  | 0.002    | 0.003    | 0.002    | 0.001 | 0.000 | 0.000 | 0.001 |
| XP_001120186PREDEDICTED: similar to HLA-B-associated transcript 3 [Apis mellifera]                          | 0.003 | 0.003 | 0.005 | 0.000 | 0.000 | 0.001 | 0.001 | 0.001 | 0.001 | 0.002 | 0.002  | 0.002    | 0.003    | 0.001    | 0.001 | 0.000 | 0.000 | 0.000 |
| XP_623432PREDEDICTED: similar to Argonase CG5893-PB isoform B [Apis mellifera]                              | 0.001 | 0.001 | 0.003 | 0.003 | 0.001 | 0.001 | 0.003 | 0.001 | 0.001 | 0.001 | 0.001  | 0.001    | 0.001    | 0.001    | 0.001 | 0.001 | 0.001 | 0.001 |
| XP_623432PREDEDICTED: similar to Hsd20C CG36605-PA isoform A isoform 1 [Apis mellifera]                     | 0.002 | 0.000 | 0.000 | 0.002 | 0.001 | 0.001 | 0.002 | 0.002 | 0.001 | 0.002 | 0.003  | 0.002    | 0.004    | 0.002    | 0.001 | 0.001 | 0.001 | 0.002 |
| XP_623487PREDEDICTED: similar to Actin-87E isoform 1 [Apis mellifera]                                       | 0.009 | 0.019 | 0.007 | 0.007 | 0.005 | 0.005 | 0.007 | 0.005 | 0.001 | 0.002 | 0.006  | 0.007    | 0.009    | 0.008    | 0.016 | 0.014 | 0.016 | 0.008 |
| XP_623487PREDEDICTED: similar to Actin 88F CG5178-PA [Apis mellifera]                                       | 0.028 | 0.007 | 0.007 | 0.010 | 0.005 | 0.010 | 0.011 | 0.008 | 0.010 | 0.010 | 0.010  | 0.012    | 0.010    | 0.008    | 0.002 | 0.028 | 0.016 | 0.012 |
| XP_623487PREDEDICTED: similar to Actin-87E isoform 1 [Apis mellifera]                                       | 0.015 | 0.008 | 0.007 | 0.007 | 0.006 | 0.006 | 0.010 | 0.011 | 0.008 | 0.010 | 0.010  | 0.012    | 0.010    | 0.008    | 0.002 | 0.028 | 0.016 | 0.012 |
| XP_623487PREDEDICTED: similar to Actin-87E isoform 2 [Apis mellifera]                                       | 0.015 | 0.008 | 0.007 | 0.007 | 0.006 | 0.006 | 0.010 | 0.011 | 0.008 | 0.010 | 0.010  | 0.012    | 0.010    | 0.008    | 0.002 | 0.028 | 0.016 | 0.012 |
| XP_393483PREDEDICTED: similar to Actin-5C isoform 1 [Apis mellifera]                                        | 0.015 | 0.008 | 0.007 | 0.007 | 0.010 | 0.005 | 0.010 | 0.011 | 0.008 | 0.010 | 0.010  | 0.012    | 0.010    | 0.008    | 0.002 | 0.028 | 0.016 | 0.012 |
| XP_392478PREDEDICTED: similar to CG4696-PA [Apis mellifera]                                                 | 0.001 | 0.001 | 0.004 | 0.004 | 0.003 | 0.001 | 0.001 | 0.001 | 0.001 | 0.001 | 0.001  | 0.001    | 0.001    | 0.001    | 0.001 | 0.001 | 0.001 | 0.001 |
| XP_623288PREDEDICTED: similar to Etb06b CG5883-PA isoform A isoform 2 [Apis mellifera]                      | 0.004 | 0.008 | 0.007 | 0.008 | 0.007 | 0.004 | 0.004 | 0.004 | 0.002 | 0.006 | 0.005  | 0.005    | 0.002    | 0.003    | 0.003 | 0.001 | 0.004 | 0.002 |
| XP_392478PREDEDICTED: similar to CG8788-PA [Apis mellifera]                                                 | 0.002 | 0.001 | 0.004 | 0.003 | 0.002 | 0.002 | 0.001 | 0.003 | 0.002 | 0.002 | 0.003  | 0.003    | 0.001    | 0.003    | 0.002 | 0.000 | 0.000 | 0.001 |
| XP_001122907PREDEDICTED: similar to yellow-42 CG1744-PA [Apis mellifera]                                    | 0.087 | 0.023 | 0.017 | 0.025 | 0.009 | 0.028 | 0.028 | 0.001 | 0.013 | 0.034 | 0.010  | 0.014    | 0.021    | 0.018    | 0.002 | 0.052 | 0.021 | 0.020 |
| XP_623432PREDEDICTED: similar to heat shock protein 8 isoform 1 [Apis mellifera]                            | 0.002 | 0.003 | 0.002 | 0.003 | 0.002 | 0.001 | 0.002 | 0.001 | 0.001 | 0.001 | 0.001  | 0.001    | 0.001    | 0.001    | 0.001 | 0.001 | 0.001 | 0.001 |
| XP_623084PREDEDICTED: similar to Aldehyde dehydrogenase CG3752-PA isoform 1 [Apis mellifera]                | 0.001 | 0.005 | 0.000 | 0.002 | 0.001 | 0.001 | 0.003 | 0.003 | 0.005 | 0.003 | 0.002  | 0.003    | 0.004    | 0.001    | 0.011 | 0.004 | 0.003 | 0.010 |
| XP_394038PREDEDICTED: similar to tubulin_beta_2 [Apis mellifera]                                            | 0.009 | 0.010 | 0.007 | 0.012 | 0.007 | 0.007 | 0.010 | 0.007 | 0.013 | 0.012 | 0.023  | 0.009    | 0.009    | 0.008    | 0.012 | 0.004 | 0.007 | 0.003 |
| XP_624156PREDEDICTED: similar to ATP synthase CG1154-PA isoform A [Apis mellifera]                          | 0.001 | 0.000 | 0.004 | 0.007 | 0.002 | 0.001 | 0.003 | 0.003 | 0.001 | 0.001 | 0.002  | 0.000    | 0.003    | 0.002    | 0.000 | 0.000 | 0.000 | 0.001 |
| XP_623432PREDEDICTED: similar to heat shock protein 8 isoform 1 [Apis mellifera]                            | 0.001 | 0.001 | 0.001 | 0.001 | 0.001 | 0.001 | 0.001 | 0.001 | 0.001 | 0.001 | 0.001  | 0.001    | 0.001    | 0.001    | 0.001 | 0.001 | 0.001 | 0.001 |
| XP_623019PREDEDICTED: similar to Actin-5C isoform 1 [Apis mellifera]                                        | 0.008 | 0.015 | 0.007 | 0.008 | 0.004 | 0.004 | 0.004 | 0.007 | 0.005 | 0.007 | 0.004  | 0.008    | 0.009    | 0.004    | 0.002 | 0.013 | 0.013 | 0.008 |
| XP_001121068PREDEDICTED: similar to T04C12.5, partial [Apis mellifera]                                      | 0.007 | 0.001 | 0.005 | 0.005 | 0.004 | 0.004 | 0.006 | 0.005 | 0.002 | 0.004 | 0.006  | 0.008    | 0.003    | 0.002    | 0.011 | 0.013 | 0.008 | 0.007 |
| XP_393099PREDEDICTED: similar to Heat shock protein cognate 3 CG4147-PA isoform A [Apis mellifera]          | 0.040 | 0.017 | 0.028 | 0.015 | 0.014 | 0.018 | 0.028 | 0.015 | 0.018 | 0.005 | 0.020  | 0.015    | 0.017    | 0.015    | 0.010 | 0.008 | 0.006 | 0.010 |
| XP_623432PREDEDICTED: similar to CG4306-PA [Apis mellifera]                                                 | 0.001 | 0.001 | 0.001 | 0.001 | 0.001 | 0.001 | 0.001 | 0.001 | 0.001 | 0.001 | 0.001  | 0.001    | 0.001    | 0.001    | 0.001 | 0.001 | 0.001 | 0.001 |
| XP_623555PREDEDICTED: similar to Nascent polypeptide associated complex protein alpha subunit CG8759-PB     | 0.001 | 0.002 | 0.001 | 0.002 | 0.001 | 0.001 | 0.001 | 0.001 | 0.003 | 0.005 | 0.000  | 0.002    | 0.001    | 0.002    | 0.002 | 0.003 | 0.006 | 0.004 |
| XP_393575PREDEDICTED: similar to Protein Iqha1/essential for life (Protein E011) isoform 1 [Apis mellifera] | 0.002 | 0.003 | 0.000 | 0.002 | 0.003 | 0.001 | 0.001 | 0.007 | 0.001 | 0.002 | 0.001  | 0.001    | 0.002    | 0.001    | 0.002 | 0.002 | 0.006 | 0.008 |
| XP_001122907PREDEDICTED: similar to CG3884-PB isoform B [Apis mellifera]                                    | 0.001 | 0.001 | 0.003 | 0.003 | 0.002 | 0.001 | 0.003 | 0.003 | 0.003 | 0.003 | 0.003  | 0.003    | 0.002    | 0.003    | 0.002 | 0.002 | 0.000 | 0.001 |
| XP_393288PREDEDICTED: similar to CG3563-PA isoform B [Apis mellifera]                                       | 0.001 | 0.001 | 0.001 | 0.001 | 0.001 | 0.001 | 0.001 | 0.001 | 0.001 | 0.001 | 0.001  | 0.001    | 0.001    | 0.001    | 0.001 | 0.001 | 0.001 | 0.001 |
| XP_623048PREDEDICTED: similar to Troponin-1 CG4898-PB isoform D [Apis mellifera]                            | 0.008 | 0.007 | 0.005 | 0.008 | 0.010 | 0.010 | 0.007 | 0.007 | 0.003 | 0.008 | 0.005  | 0.005    | 0.008    | 0.008    | 0.009 | 0.009 | 0.009 | 0.009 |
| XP_001121022PREDEDICTED: similar to CG32446-PA [Apis mellifera]                                             | 0.002 | 0.001 | 0.002 | 0.004 | 0.002 | 0.002 | 0.002 | 0.002 | 0.002 | 0.003 | 0.000  | 0.002    | 0.003    | 0.004    | 0.000 | 0.000 | 0.001 | 0.001 |
| XP_393333PREDEDICTED: similar to Myosin heavy chain CG17927-P                                               |       |       |       |       |       |       |       |       |       |       |        |          |          |          |       |       |       |       |
