# Supplementary material
Source: PubMed Central journal article supplement (PMC3212421)
Supplement: supp_214.23.3977_JEB061499TableS2.pdf [file supp_214.23.3977_JEB061499TableS2.pdf]

Table S2. *Post hoc*  $\chi^2$  comparisons of DNA methylation band numbers between the four treatment groups sampled as 4th and 5th instar larvae

| Treatment                                           | $\chi^2$ | d.f. | P-value      |
|-----------------------------------------------------|----------|------|--------------|
| 4th instar larvae                                   |          |      |              |
| Control and <i>IRS</i> <sup>-</sup>                 | 2.78     | 1    | 0.095*       |
| Control and <i>TOR</i> <sup>-</sup>                 | 6.62     | 1    | 0.010*       |
| Control and <i>IRS/TOR</i>                          | 5.82     | 1    | 0.016*       |
| <i>IRS</i> <sup>-</sup> and <i>IRS/TOR</i>          | 0.58     | 1    | 0.448 (n.s.) |
| <i>TOR</i> <sup>-</sup> and <i>IRS/TOR</i>          | .03      | 1    | 0.872 (n.s.) |
| <i>IRS</i> <sup>-</sup> and <i>TOR</i> <sup>-</sup> | 0.85     | 1    | 0.357 (n.s.) |
| 5th instar larvae                                   |          |      |              |
| Control and <i>IRS</i> <sup>-</sup>                 | 3.76     | 1    | 0.053*       |
| Control and <i>TOR</i> <sup>-</sup>                 | 9.41     | 1    | 0.002**      |
| Control and <i>IRS/TOR</i>                          | 1.12     | 1    | 0.289 (n.s.) |
| <i>IRS</i> <sup>-</sup> and <i>IRS/TOR</i>          | 0.78     | 1    | 0.378 (n.s.) |
| <i>TOR</i> <sup>-</sup> and <i>IRS/TOR</i>          | 4.14     | 1    | 0.042*       |
| <i>IRS</i> <sup>-</sup> and <i>TOR</i> <sup>-</sup> | 1.38     | 1    | 0.239 (n.s.) |

Asterisks indicate significant differences between groups (\* $P < 0.05$ , \*\* $P < 0.005$ ).
