# Supplementary material
Source: PubMed Central journal article supplement (PMC3212421)
Supplement: supp_214.23.3977_JEB061499TableS3.pdf [file supp_214.23.3977_JEB061499TableS3.pdf]

Table S3. RT-PCR and qPCR primers for candidate genes along with the corresponding GenBank accession numbers

| Target gene  | GenBank accession no. | Primers                                                         |
|--------------|-----------------------|-----------------------------------------------------------------|
| <i>Actin</i> | XM 623378             | Fp 5'-TGCCAACACTGTCCTTTCTG-3'<br>Rp 5'-AGAATTGACCCACCAATCCA-3'  |
| <i>IRS</i>   | XM 391985             | Fp 5'-TTTGCAGTCGTTGCTGGTA-3'<br>Rp 5'-TAGCGGTAGTGGCACAGTTG-3'   |
| <i>TOR</i>   | XM 625127             | Fp 5'-AACAACTGTTGCTGACGGTG-3'<br>Rp 5'-GTTGCAGTCCAGGCTTTTTG-3'  |
| <i>ILP 2</i> | GB10174               | Fp 5'-TTCCAGAAATGGAGATGGATG-3'<br>Rp 5'-TAGGAGCGCAACTCCTCTGT-3' |
| <i>ILP 1</i> | GB17332               | Fp 5'-CGATAGTCCTGGTCGGTTTG-3'<br>Rp 5'-CAAGCTGAGCATTGCAC-3'     |
| <i>PI3K</i>  | XM 396869             | Fp 5'-TGAATTTGGCTTAACTGGAT3'<br>Rp 5'-TTTCAACTGCTCGTTCGTAT-3'   |
| <i>PDK1</i>  | XM 394208             | Fp 5'-AGCTTCTCCACGTTTACCT-3'<br>Rp 5'-ACTCCGTCTTCTTCTCCTTG-3'   |
| <i>PIP5K</i> | XM 001120893          | Fp 5'-CGAACTCGAAAGATGCTGCC-3'<br>Rp 5'-ATCCACCGAGCGCACTGACT-3'  |
