# Supplementary material
Source: PubMed Central journal article supplement (PMC3212421)
Supplement: supp_214.23.3977_JEB061499TableS4.pdf [file supp_214.23.3977_JEB061499TableS4.pdf]

Table S4. Primer and adapter sequences used to determine DNA methylation patterns in larvae using methylation-sensitive amplified fragment length polymorphism

|                                    | Sequence                                          |
|------------------------------------|---------------------------------------------------|
| <i>EcoRI</i> adaptor               | CTC GTA GAC TGC GTA CC<br>AAT TGG TAC GCA GTC TAC |
| <i>MspI-HpaII</i> adaptor          | GAC GAT GAG TCT AGA A<br>CGT TCT AGA CTC ATC      |
| <i>EcoRI</i> preselect primer      | GAC TGC GTA CCA ATT C                             |
| <i>MspI-HpaII</i> preselect primer | GAT GAG TCT AGA ACG GA                            |
| E1                                 | GAC TGC GTA CCA ATT CAC                           |
| E2                                 | GAC TGC GTA CCA ATT CAA                           |
| E3                                 | GAC TGC GTA CCA ATT CAG                           |
| E4                                 | GAC TGC GTA CCA ATT CAT                           |
| M1                                 | GAT GAG TCT AGA ACG GAAT                          |
| M2                                 | GAT GAG TCT AGA ACG GATC                          |
| M3                                 | GAT GAG TCT AGA ACG GACT                          |
