# Supplementary material
Source: PubMed Central journal article supplement (PMC3212421)

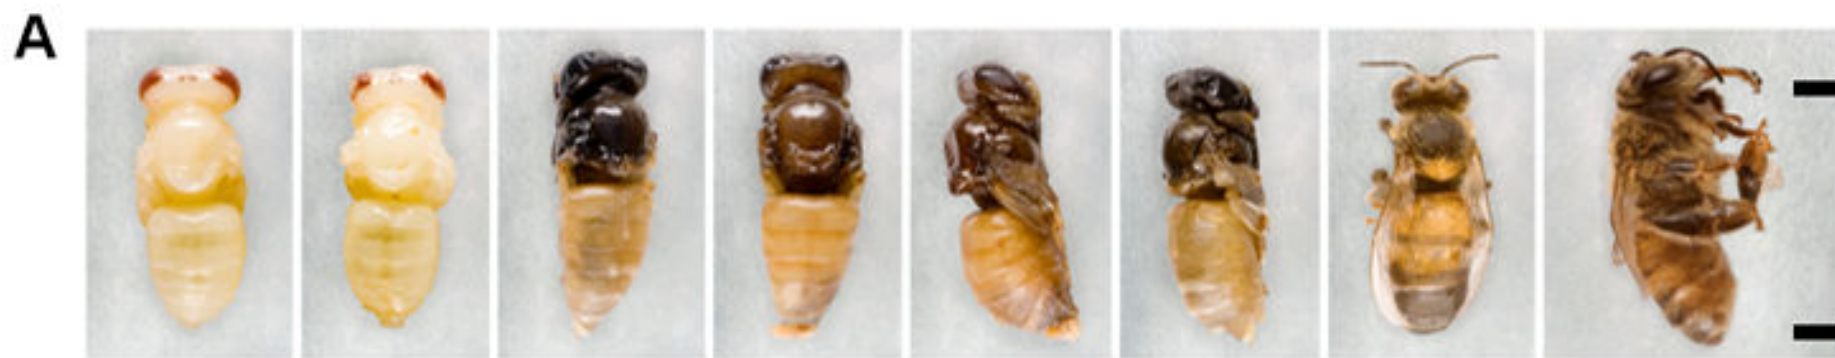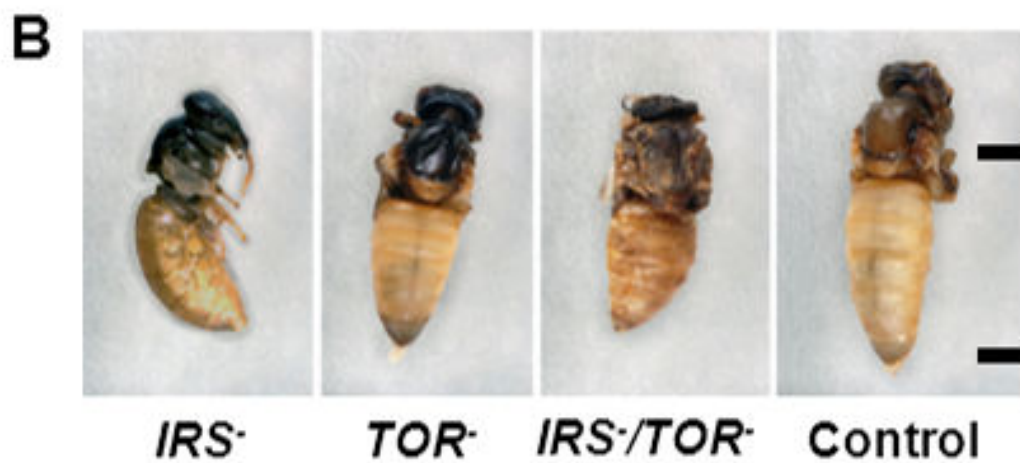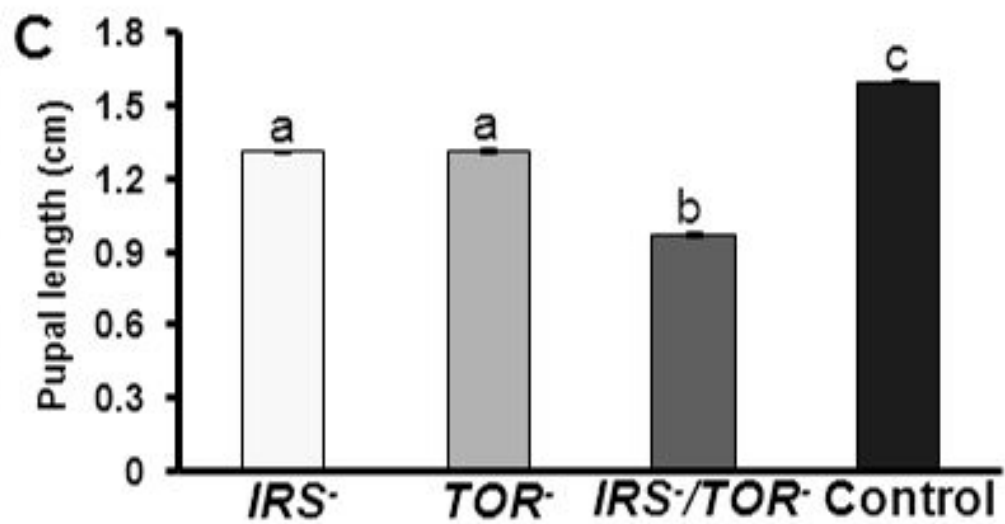

Supplement: supp_214.23.3977_JEB061499FigS2.pdf [file supp_214.23.3977_JEB061499FigS2.pdf]

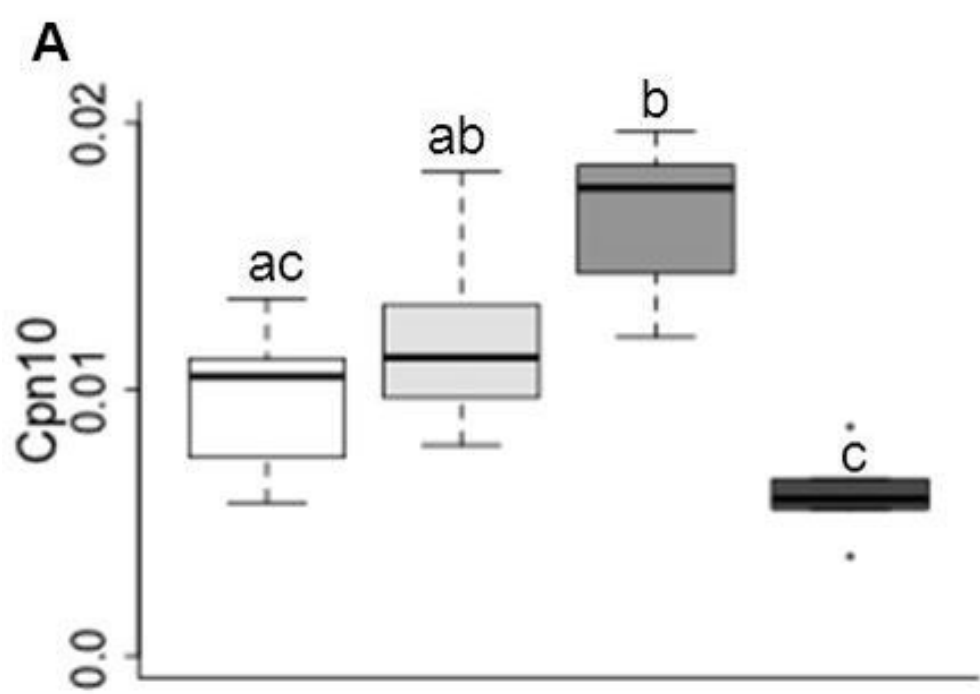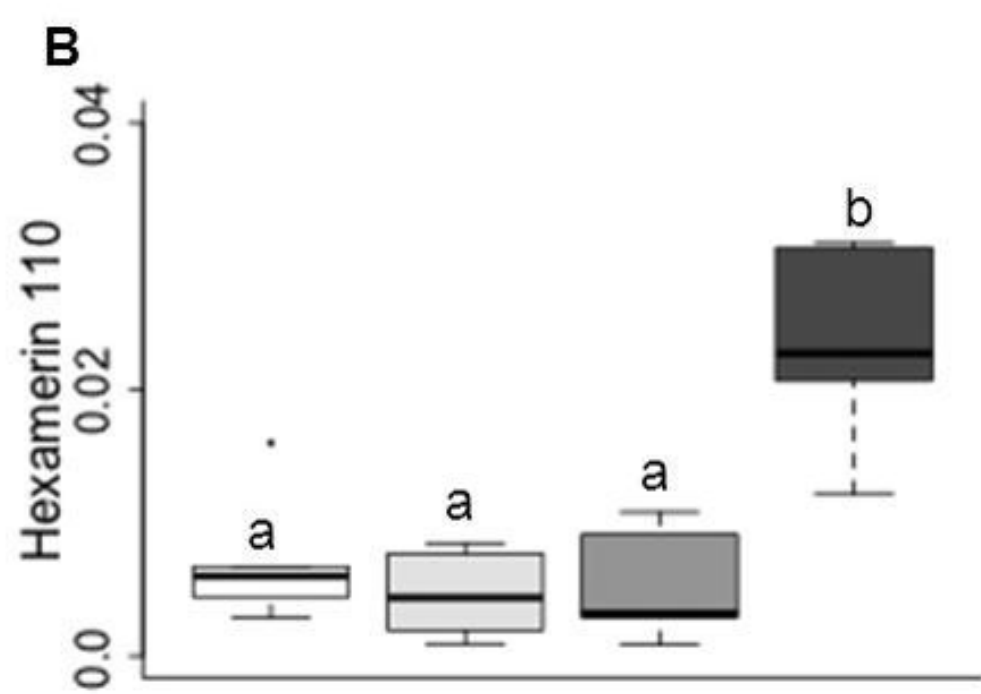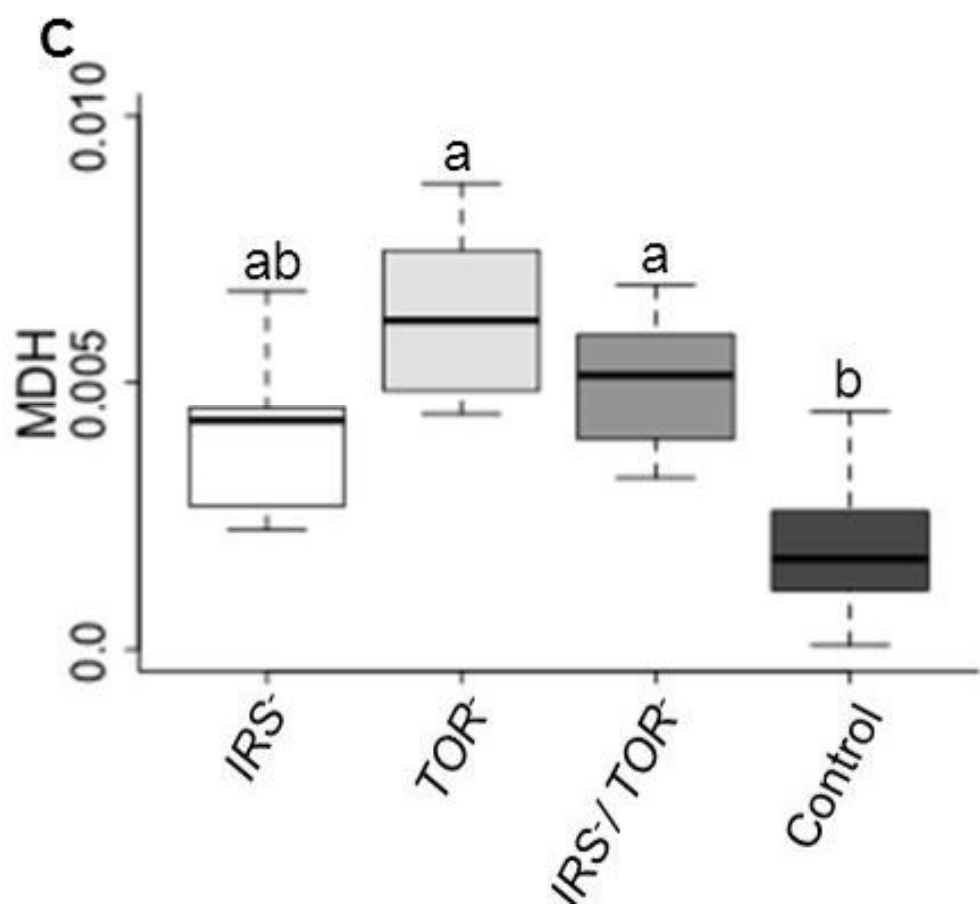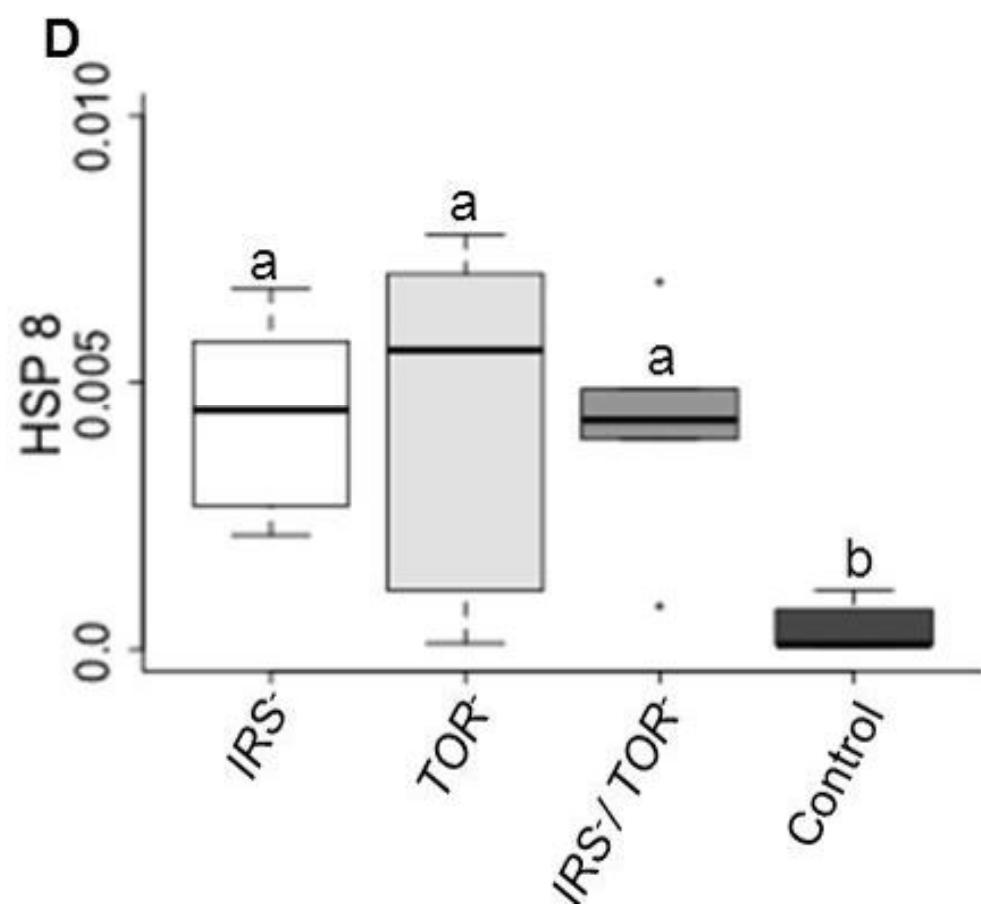

Supplement: supp_214.23.3977_JEB061499FigS3.pdf [file supp_214.23.3977_JEB061499FigS3.pdf]
